# Supplementary material for: A 25-Year Analysis of Liver Disease–Hypertension Comorbid Mortality Trends in the United States, 1999–2023
Source: Research Square preprint supplement (doi:10.21203/rs.3.rs-7586042/v1), 2025-09-12
Supplement: Supplementary file 1 [file 44e080c15146e6a5514d4687.docx]

**Supplemental Table 1: Total Deaths and Demographic Characteristics for Hypertension and Liver Disease–Related Mortality, Adults Aged ≥25 Years, United States, 1999–2023.**

| **Year** | **Total Number of Deaths** | | | | | | |
| --- | --- | --- | --- | --- | --- | --- | --- |
| **Overall** | **Female** | **Male** | **NH Black or African**  **American** | **NH White** | **NH Others** | **Hispanic or Latino** |
| **1999** | 2307 | 1018 | 1289 | 417 | 1596 | 68 | 220 |
| **2000** | 3323 | 1399 | 1924 | 606 | 2279 | 110 | 316 |
| **2001** | 3546 | 1472 | 2074 | 643 | 2387 | 137 | 364 |
| **2002** | 3969 | 1694 | 2275 | 691 | 2703 | 130 | 430 |
| **2003** | 4438 | 1771 | 2667 | 709 | 3040 | 192 | 478 |
| **2004** | 4452 | 1797 | 2655 | 684 | 3095 | 178 | 475 |
| **2005** | 4693 | 1843 | 2850 | 720 | 3209 | 178 | 574 |
| **2006** | 5026 | 1975 | 3051 | 781 | 3466 | 224 | 544 |
| **2007** | 5442 | 2076 | 3366 | 796 | 3728 | 234 | 671 |
| **2008** | 5678 | 2159 | 3519 | 825 | 3876 | 204 | 762 |
| **2009** | 5940 | 2322 | 3618 | 930 | 3952 | 231 | 805 |
| **2010** | 6265 | 2378 | 3887 | 888 | 4226 | 275 | 855 |
| **2011** | 6829 | 2489 | 4340 | 1019 | 4614 | 255 | 921 |
| **2012** | 7386 | 2702 | 4684 | 1098 | 4971 | 324 | 972 |
| **2013** | 8116 | 2987 | 5129 | 1152 | 5464 | 316 | 1146 |
| **2014** | 8256 | 2968 | 5288 | 1113 | 5514 | 333 | 1248 |
| **2015** | 8755 | 3191 | 5564 | 1181 | 5871 | 357 | 1302 |
| **2016** | 9593 | 3548 | 6045 | 1243 | 6507 | 413 | 1375 |
| **2017** | 10273 | 3813 | 6460 | 1301 | 6939 | 486 | 1489 |
| **2018** | 11254 | 4127 | 7127 | 1340 | 7682 | 468 | 1707 |
| **2019** | 12230 | 4541 | 7689 | 1484 | 8493 | 511 | 1694 |
| **2020** | 15709 | 5917 | 9792 | 1893 | 10653 | 752 | 2365 |
| **2021** | 18021 | 6814 | 11207 | 2169 | 12333 | 760 | 2610 |
| **2022** | 18396 | 7020 | 11376 | 2120 | 12892 | 713 | 2492 |
| **2023** | 18769 | 7076 | 11693 | 2100 | 13101 | 797 | 2577 |

**Footnotes:**

- Data source: CDC WONDER Multiple Cause of Death database, 1999–2023.
- Liver disease deaths were identified with ICD-10 codes K70–K77; hypertension-related deaths with I10–I15.
- Deaths included if either condition appeared as underlying or contributing cause.
- Adults aged ≥25 years.
- Counts are unadjusted. Percentages may not total 100% due to rounding

**Supplemental Table 2: Annual Percent Changes (APCs) and Average Annual Percentage Changes (AAPCs) in Age-Adjusted Mortality Rates for Liver Disease and Hypertension-Related Deaths per 100,000 Population, United States, 1999–2023**

| **Year Interval** | **APC (95% CI )** | **AAPC (95% CI)** |
| --- | --- | --- |
| **Overall** | | |
| 1999 – 2001 | 19.50* (7.57 to 32.76) | 6.71* (5.64 to 7.80) |
| 2001 – 2018 | 4.27* (4.00 to 4.63) |
| 2018 – 2021 | 17.64* (12.42 to 23.11) |
| 2021 – 2023 | 0.28 ( -3.56 to 4.29) |
| **Male** | | |
| 1999 – 2001 | 23.31* (7.23 to 41.81) | 7.07* (5.69 to 8.47) |
| 2001 – 2018 | 4.50* (4.17 to 4.83) |
| 2018 – 2021 | 16.69* (10.64 to 23.07) |
| 2021 – 2023 | 0.42 ( -4.44 to 5.54) |
| **Female** | | |
| 1999 – 2001 | 18.34* (3.55 to 35.23) | 6.49* (5.07 to 7.92) |
| 2001 – 2018 | 3.81* (3.44 to 4.18) |
| 2018 – 2021 | 20.04* (12.69 to 27.88) |
| 2021 – 2023 | –0.56 ( -6.02 to 5.21) |
| **NH Black or African American** | | |
| 1999 – 2018 | 1.81* (1.25 to 2.37) | 3.11* (1.22 to 5.04) |
| 2018 – 2021 | 15.75* (1.22 to 32.37) |
| 2021 – 2023 | -2.21 ( -13.13 to 10.08) |
| **NH White** | | |
| 1999 – 2001 | 19.86* (5.54 to 36.12) | 7.53* (6.19 to 8.89) |
| 2001 – 2018 | 4.91* (4.55 to 5.27) |
| 2018 – 2021 | 19.51* (12.65 to 26.78) |
| 2021 – 2023 | 1.54 ( -3.18 to 6.50) |
| **NH Others** | | |
| 1999 – 2015 | 1.56 ( -0.22 to 3.39) | 3.42* (1.95 to 4.91) |
| 2015 – 2023 | 7.24* (4.22 to 10.34) |
| **Hispanic or Latino** | | |
| 1999 – 2018 | 3.81* (3.21 to 4.40) | 4.12* (2.57 to 5.69) |
| 2018 – 2021 | 11.93* (0.72 to 24.38) |
| 2021 – 2023 | -3.89 ( -12.80 to 5.91) |
| **Northeast** | | |
| 1999 – 2006 | 13.23* (10.34 to 16.21) | 7.43* (5.91 to 8.97) |
| 2006 – 2018 | 4.17* (3.33 to 5.03) |
| 2018 – 2021 | 16.91* (7.01 to 27.72) |
| 2021 – 2023 | –5.34 ( -12.82 to 2.77) |
| **Midwest** | | |
| 1999 – 2007 | 13.53* (12.17 to 14.92) | 6.59* (5.68 to 7.50) |
| 2007 – 2017 | 1.93* (1.26 to 2.61) |
| 2017 – 2020 | 18.20* (10.97 to 25.90) |
| 2020 – 2023 | –5.71* ( -6.47 to –4.94) |
| **South** | | |
| 1999 – 2006 | 14.57* (12.88 to 16.30) | 8.11* (7.24 to 8.99) |
| 2006 – 2017 | 3.02* (2.47 to 3.57) |
| 2017 – 2020 | 21.21* (14.78 to 27.99) |
| 2020 – 2023 | 0.52 ( -1.62 to 2.71) |
| **West** | | |
| 1999 – 2005 | 15.38* (13.36 to 17.44) | 6.96* (6.08 to 7.85) |
| 2005 – 2012 | 4.69* (3.51 to 5.89) |
| 2012 – 2018 | 0.84 ( -0.42 to 2.13) |
| 2018 – 2021 | 18.01* (12.70 to 23.57) |
| 2021 – 2023 | –5.43* ( -9.29 to –1.40) |

**Footnotes:**

- Data source: CDC WONDER Multiple Cause of Death database, 1999–2023.
- Mortality rates are age-adjusted to the 2000 U.S. standard population and expressed per 100,000.
- Joinpoint Regression Program used with log-linear models.
- APC is reported with 95% CI. * indicates statistical significance (p < 0.05).
- Rates for NH American Indian or Alaska Native adults are available starting in 2000; data for 1999 were suppressed/not reported due to small counts.

**Supplemental Table 3: Overall and Sex-Stratified Age-Adjusted Mortality Rates for Liver Disease and Hypertension-Related Deaths per 100,000 Population, United States, 1999–2023**

| **Year** | **AAMR - Age-Adjusted Mortality Rates per 100,000** | | |
| --- | --- | --- | --- |
| **Male** | **Female** | **Overall** |
| **1999** | 1.61 (1.52–1.7) | 1 (0.94–1.06) | 1.30 (1.25–1.36) |
| **2000** | 2.39 (2.28–2.5) | 1.34 (1.27–1.41) | 1.84 (1.78–1.91) |
| **2001** | 2.56 (2.45–2.67) | 1.41 (1.33–1.48) | 1.94 (1.88–2.01) |
| **2002** | 2.7 (2.59–2.82) | 1.6 (1.52–1.67) | 2.13 (2.06–2.2) |
| **2003** | 3.1 (2.99–3.22) | 1.65 (1.58–1.73) | 2.34 (2.27–2.41) |
| **2004** | 3.02 (2.91–3.14) | 1.66 (1.58–1.74) | 2.3 (2.24–2.37) |
| **2005** | 3.13 (3.01–3.25) | 1.66 (1.59–1.74) | 2.38 (2.31–2.45) |
| **2006** | 3.26 (3.14–3.38) | 1.76 (1.68–1.84) | 2.50 (2.43–2.57) |
| **2007** | 3.56 (3.43–3.68) | 1.8 (1.72–1.87) | 2.61 (2.54–2.68) |
| **2008** | 3.61 (3.49–3.74) | 1.85 (1.77–1.92) | 2.68 (2.61–2.75) |
| **2009** | 3.6 (3.48–3.72) | 1.98 ( 1.9–2.06) | 2.74 (2.67–2.81) |
| **2010** | 3.82 (3.7–3.95) | 1.98 (1.0–2.06) | 2.84 (2.77–2.91) |
| **2011** | 4.1 (3.98–4.23) | 2.06 (1.98–2.15) | 3 (2.92–1.07) |
| **2012** | 4.34 (4.21–4.46) | 2.17 (2.08–2.25) | 3.18 (3.11–3.25) |
| **2013** | 4.64 (4.51–4.77) | 2.32 (2.23–2.4) | 3.41 (3.34–3.29) |
| **2014** | 4.69 (4.56–4.82) | 2.28 (2.2–2.37) | 3.41 (3.34–3.49) |
| **2015** | 4.81 (4.68–4.94) | 2.4 (2.31–2.48) | 3.54 (3.46–3.61) |
| **2016** | 5.12 (4.99–5.25) | 2.63 (2.54–2.72) | 3.83 (3.75–3.91) |
| **2017** | 5.43 (5.3–5.57) | 2.75 (2.66–2.84) | 4 (3.92–4.08) |
| **2018** | 5.84 (5.71–5.98) | 2.92 (2.83–3.01) | 4.30 (4.22–4.39) |
| **2019** | 6.2 (6.06–6.34) | 3.16 (3.07–3.26) | 4.59 (4.50–4.67) |
| **2020** | 7.85 (7.69–8.01) | 4.06 (3.96–4.17) | 5.86 (5.77–5.95) |
| **2021** | 8.92 (8.75–9.09) | 4.74 (4.63–4.86) | 6.70 (6.60–6.80) |
| **2022** | 8.91 (8.74–9.07) | 4.76 (4.67–4.86) | 6.69 (6.59–6.79) |
| **2023** | 9.02 (8.85–9.19) | 4.71 (4.60–4.83) | 6.75 (6.66–6.85) |

**Footnotes:**

- Age-adjusted mortality rates per 100,000, standardized to the 2000 U.S. population.
- Adults aged ≥25 years.
- Rates presented separately for males and females.

**Supplemental Table 4: Age-Adjusted Mortality Rates for Liver Disease and Hypertension-Related Deaths per 100,000 Population, Stratified by Race/Ethnicity, United States, 1999–2023.**

| **Year** | **AAMR- Age-Adjusted Mortality Rates per 100,000** | | | |
| --- | --- | --- | --- | --- |
| **NH Black or**  **African American** | **NH White** | **NH Others** | **Hispanic or Latino** |
| **1999** | 2.53 (2.28–2.78) | 1.1 (1.04–1.15) | 1.32 (1.01–1.69) | 2.17 (1.86–2.47) |
| **2000** | 3.61 (3.32–3.9) | 1.54 (1.48–1.6) | 1.96 (1.58–2.35) | 2.94 (2.6–3.28) |
| **2001** | 3.68 (3.39–3.97) | 1.62 (1.56–1.69) | 2.16 (1.78–2.54) | 3.21 (2.86–3.56) |
| **2002** | 3.84 (3.55–4.13) | 1.82 (1.75–1.89) | 2.16 (1.77–2.55) | 3.65 (3.29–4.02) |
| **2003** | 3.84 (3.55–4.13) | 2 (1.93–2.07) | 2.89 (2.46–3.32) | 3.65 (3.3-3.99) |
| **2004** | 3.61 (3.33–3.88) | 2.03 (1.95–2.1) | 2.52 (2.13–2.91) | 3.59 (3.25–3.93) |
| **2005** | 3.64 (3.37–3.91) | 2.08 (2.01–2.16) | 2.36 (2–2.73) | 4.09 (3.74–4.44) |
| **2006** | 3.83 (3.55–4.11) | 2.19 (2.11–2.26) | 2.77 (2.39–3.15) | 3.71 (3.38–4.04) |
| **2007** | 3.76 (3.49–4.03) | 2.31 (2.24–2.39) | 2.91 (2.53–3.3) | 4.21 (3.87–4.55) |
| **2008** | 3.81 (3.54–4.07) | 2.37 (2.3–2.45) | 2.28 (1.96–2.61) | 4.53 (4.19–4.86) |
| **2009** | 4.12 (3.85–4.39) | 2.4 (2.32–2.47) | 2.5 (2.16–2.83) | 4.64 (4.3–4.97) |
| **2010** | 3.88 (3.62–4.15) | 2.52 (2.44–2.6) | 2.82 (2.48–3.17) | 4.7 (4.37–5.03) |
| **2011** | 4.21 (3.95–4.48) | 2.71 (2.63–2.79) | 2.39 (2.08–2.69) | 4.66 (4.34–4.98) |
| **2012** | 4.51 (4.24–4.79) | 2.87 (2.79–2.95) | 2.92 (2.59–3.25) | 4.82 (4.51–5.14) |
| **2013** | 4.51 (4.25–4.78) | 3.1 (3.02–3.18) | 2.66 (2.36–2.96) | 5.37 (5.05–5.7) |
| **2014** | 4.28 (4.02–4.24) | 3.11 (3.02–3.19) | 2.68 (2.38–2.98) | 5.55 (5.23–5.87) |
| **2015** | 4.45 (4.19–4.71) | 3.22 (3.13–3.3) | 2.68 (2.39–2.96) | 5.52 (5.2–5.83) |
| **2016** | 4.6 (4.33–4.86) | 3.55 (3.46–3.64) | 2.94 (2.65–3.23) | 5.68 (5.37–6) |
| **2017** | 4.72 (4.46–4.99) | 3.76 (3.67–3.85) | 3.37 (3.07–3.68) | 5.75 (5.44–6.05) |
| **2018** | 4.74 (4.48–5) | 4.09 (4–4.19) | 3.13 (2.84–3.42) | 6.44 (6.12–6.76) |
| **2019** | 5.1 (4.83–5.36) | 4.44 (4.34–4.54) | 3.32 (3.02–3.61) | 6.13 (5.82–6.43) |
| **2020** | 6.38 (6.08–6.67) | 5.58 (5.47–5.69) | 4.64 (4.3–4.98) | 8.19 (7.85–8.53) |
| **2021** | 7.42 (7.09–7.74) | 6.58 (6.45–6.7) | 4.77 (4.43–5.11) | 8.77 (8.42–9.12) |
| **2022** | 7.16 (6.85–7.47) | 6.73 (6.61–6.85) | 4.32 (4–4.64) | 8.1 (7.77–8.43) |
| **2023** | 7.02 (6.71–7.32) | 6.77 (6.65–6.9) | 4.67 (4.34–4.99) | 8.15 (7.82–8.48) |

**Notes:** Race/ethnicity categories follow bridged-race classifications: non-Hispanic (NH) White, NH Black or African American, Hispanic or Latino, and NH “Others.” The “NH Others” category includes NH American Indian or Alaska Native (AI/AN) and NH Asian or Pacific Islander (API). Mortality rates for NH AI/AN adults in 1999 were suppressed by CDC WONDER due to small counts and are therefore not displayed separately; beginning in 2000, values are available.

**Supplemental Table 5: Age-Adjusted Mortality Rates for Liver Disease and Hypertension-Related Deaths per 100,000 Population, by State, United States, 1999–2023.**

| **Year** | **AAMR – Age-Adjusted Mortality Rates per 100,000** |
| --- | --- |
| **Alabama** |  |
| 1999 | 1.56 (1.14–2.08) |
| 2000 | 2.02 (1.54–2.61) |
| 2001 | 1.73 (1.29–2.27) |
| 2002 | 1.71 (1.27–2.24) |
| 2003 | 1.98 (1.51–2.55) |
| 2004 | 2.13 (1.65–2.7) |
| 2005 | 2.48 (1.96–3.09) |
| 2006 | 1.82 (1.38–2.35) |
| 2007 | 2.27 (1.78–2.85) |
| 2008 | 2.67 (2.15–3.28) |
| 2009 | 3.23 (2.63–3.84) |
| 2010 | 2.53 (2.03–3.12) |
| 2011 | 2.28 (1.8–2.84) |
| 2012 | 2.46 (1.98–3.02) |
| 2013 | 2.77 (2.22–3.32) |
| 2014 | 2.64 (2.12–3.16) |
| 2015 | 2.75 (2.21–3.29) |
| 2016 | 2.73 (2.2–3.27) |
| 2017 | 2.91 (2.37–3.44) |
| 2018 | 2.34 (1.88–2.87) |
| 2019 | 3.31 (2.74–3.89) |
| 2020 | 3.55 (2.96–4.15) |
| 2021 | 4.49 (3.83–5.15) |
| 2022 | 4.53 (3.87–5.18) |
| **Alaska** |  |
| 2010 | Unreliable data (2.09–6.15) |
| 2012 | Unreliable data (1.67–5.97) |
| 2013 | Unreliable (2.09–5.94) |
| 2014 | 5.82 (3.73–8.66) |
| 2015 | Unreliable data (1.58–4.85) |
| 2016 | 5.79 (3.74–8.54) |
| 2017 | 4.53 (2.84–6.86) |
| 2018 | 4.6 (2.77–7.18) |
| 2019 | Unreliable data (2.66–7.08) |
| 2020 | 8.24 (5.83–11.31) |
| 2021 | 5.25 (3.4–7.75) |
| 2022 | 5.71 (3.85–8.15) |
| 2023 | 9.17 (6.66–12.31) |
| **Arizona** |  |
| 1999 | 0.84 (0.55–1.23) |
| 2000 | 1.09 (0.76–1.51) |
| 2001 | 1.15 (0.82–1.58) |
| 2002 | 1.32 (0.96–1.77) |
| 2003 | 1.31 (0.96–1.74) |
| 2004 | 1.24 (0.91–1.66) |
| 2005 | 1.79 (1.39–2.27) |
| 2006 | 1.22 (0.89–1.63) |
| 2007 | 1.32 (0.99–1.72) |
| 2008 | 1.76 (1.38–2.21) |
| 2009 | 1.12 (0.83–1.48) |
| 2010 | 1.75 (1.39–2.18) |
| 2011 | 2.19 (1.77–2.62) |
| 2012 | 2.68 (2.21–3.15) |
| 2013 | 3.53 (3–4.05) |
| 2014 | 3.61 (3.08–4.15) |
| 2015 | 4.01 (3.46–4.57) |
| 2016 | 3.73 (3.21–4.25) |
| 2017 | 4.36 (3.8–4.93) |
| 2018 | 4.24 (3.7–4.78) |
| 2019 | 3.99 (3.47–4.51) |
| 2020 | 5.68 (5.07–6.3) |
| 2021 | 6.94 (6.26–7.62) |
| 2022 | 5.88 (5.26–6.49) |
| 2023 | 6.23 (5.6–6.85) |
| **Arkansas** |  |
| 1999 | Unreliable data (0.39–1.26) |
| 2000 | Unreliable data (0.62–1.62) |
| 2001 | Unreliable data (0.36–1.16) |
| 2002 | 1.58 (1.07–2.26) |
| 2003 | 1.96 (1.39–2.7) |
| 2004 | 2.14 (1.53–2.9) |
| 2005 | 1.86 (1.3–2.57) |
| 2006 | 2.16 (1.57–2.91) |
| 2007 | 2.34 (1.72–3.1) |
| 2008 | 2.19 (1.59–2.94) |
| 2009 | 1.96 (1.41–2.65) |
| 2010 | 2.93 (2.25–3.75) |
| 2011 | 2.74 (2.09–3.54) |
| 2012 | 2 (1.45–2.69) |
| 2013 | 2.97 (2.3–3.78) |
| 2014 | 3.46 (2.73–4.33) |
| 2015 | 4.33 (3.5–5.3) |
| 2016 | 5.51 (4.53–6.48) |
| 2017 | 5.29 (4.32–6.26) |
| 2018 | 6.39 (5.36–7.42) |
| 2019 | 7.75 (6.62–8.87) |
| 2020 | 9.12 (7.87–10.37) |
| 2021 | 9.49 (8.25–10.73) |
| 2022 | 8.39 (7.22–9.56) |
| 2023 | 8.74 (7.55–9.93) |
| **California** |  |
| 1999 | 2.47 (2.25–2.69) |
| 2000 | 3.31 (3.05–3.57) |
| 2001 | 3.06 (2.81–3.3) |
| 2002 | 4.04 (3.76–4.32) |
| 2003 | 4.33 (4.05–4.61) |
| 2004 | 4.12 (3.85–4.39) |
| 2005 | 4.26 (3.98–4.53) |
| 2006 | 4.32 (4.05–4.6) |
| 2007 | 4.73 (4.45–5.02) |
| 2008 | 4.92 (4.63–5.21) |
| 2009 | 4.65 (4.37–4.92) |
| 2010 | 4.76 (4.49–5.04) |
| 2011 | 4.92 (4.64–5.2) |
| 2012 | 4.94 (4.66–5.21) |
| 2013 | 5.28 (5–5.56) |
| 2014 | 5.46 (5.17–5.74) |
| 2015 | 4.95 (4.69–5.21) |
| 2016 | 5.29 (5.02–5.56) |
| 2017 | 5.16 (4.89–5.43) |
| 2018 | 5.36 (5.09–5.63) |
| 2019 | 5.35 (5.08–5.61) |
| 2020 | 6.64 (6.34–6.94) |
| 2021 | 7.56 (7.24–7.88) |
| 2022 | 6.97 (6.67–7.27) |
| 2023 | 7.02 (6.72–7.32) |
| **Colorado** |  |
| 1999 | 0.87 (0.52–1.35) |
| 2000 | 1.3 (0.88–1.85) |
| 2001 | 1.44 (1–2.02) |
| 2002 | 1.37 (0.94–1.92) |
| 2003 | 1.36 (0.95–1.89) |
| 2004 | 1.49 (1.06–2.02) |
| 2005 | 1.88 (1.4–2.48) |
| 2006 | 2.13 (1.62–2.74) |
| 2007 | 2.67 (2.11–3.32) |
| 2008 | 2.35 (1.84–2.96) |
| 2009 | 2.17 (1.68–2.76) |
| 2010 | 1.8 (1.37–2.33) |
| 2011 | 1.93 (1.48–2.48) |
| 2012 | 1.84 (1.42–2.35) |
| 2013 | 2.39 (1.91–2.95) |
| 2014 | 2.7 (2.17–3.24) |
| 2015 | 3.24 (2.67–3.81) |
| 2016 | 4.07 (3.43–4.7) |
| 2017 | 5.49 (4.75–6.22) |
| 2018 | 7.21 (6.37–8.05) |
| 2019 | 7.2 (6.38–8.03) |
| 2020 | 8.3 (7.42–9.17) |
| 2021 | 10.51 (9.52–11.5) |
| 2022 | 9.21 (8.29–10.13) |
| 2023 | 8.87 (7.98–9.76) |
| **Connecticut** |  |
| 1999 | 0.96 (0.6–1.45) |
| 2000 | 1.51 (1.05–2.08) |
| 2001 | 1.93 (1.42–2.56) |
| 2002 | 1.77 (1.28–2.37) |
| 2003 | 1.5 (1.05–2.06) |
| 2004 | 1.73 (1.25–2.32) |
| 2005 | 1.58 (1.13–2.14) |
| 2006 | 2.00 (1.48–2.64) |
| 2007 | 2.22 (1.68–2.87) |
| 2008 | 2.18 (1.66–2.82) |
| 2009 | 1.81 (1.33–2.39) |
| 2010 | 1.77 (1.31–2.34) |
| 2011 | 2.05 (1.54–2.68) |
| 2012 | 1.65 (1.15–2.17) |
| 2013 | 1.95 (1.47–2.53) |
| 2014 | 1.78 (1.31–2.36) |
| 2015 | 1.65 (1.2–2.21) |
| 2016 | 2.2 (1.69–2.81) |
| 2017 | 1.73 (1.29–2.29) |
| 2018 | 2.09 (1.59–2.69) |
| 2019 | 2.04 (1.56–2.61) |
| 2020 | 2.56 (2.01–3.2) |
| 2021 | 2.87 (2.31–3.53) |
| 2022 | 3.64 (2.93–4.36) |
| 2023 | 2.87 (2.31–3.52) |
| **Delaware** |  |
| 2001 | Unreliable data (2.01–5.36) |
| 2002 | Unreliable data (2.09–5.43) |
| 2003 | Unreliable data (1.66–4.72) |
| 2005 | Unreliable data (0.80–3.09) |
| 2006 | Unreliable data (1.46–4.14) |
| 2007 | 3.12 (1.90–4.82) |
| 2009 | 3.58 (2.29–5.32) |
| 2010 | Unreliable data (1.61–4.19) |
| 2011 | 2.87 (1.73–4.49) |
| 2012 | 3.67 (2.35–5.46) |
| 2013 | Unreliable data (1.48–3.95) |
| 2014 | 3.26 (2.11–4.82) |
| 2015 | Unreliable data (1.09–3.35) |
| 2016 | Unreliable data (1.04–3.19) |
| 2017 | 2.37 (1.43–3.71) |
| 2018 | Unreliable data (1.10–3.23) |
| 2019 | Unreliable data (1.24–3.4) |
| 2020 | 5.17 (3.79–6.9) |
| 2021 | 5.31 (3.87–7.11) |
| 2022 | 7.59 (5.96–9.52) |
| 2023 | 11.01 (8.94–13.07) |
| **District of Columbia** |  |
| 2000 | 5.78 (3.58–8.84) |
| 2001 | Unreliable data (3.17–8.21) |
| 2002 | Unreliable data (2.95–7.87) |
| 2004 | Unreliable data (2.29–6.74) |
| 2005 | 5.34 (3.26–8.25) |
| 2006 | Unreliable data (3.1–8.05) |
| 2007 | Unreliable data (2.48–7.04) |
| 2008 | 5.9 (3.74–8.86) |
| 2009 | Unreliable data (2.92–7.71) |
| 2010 | Unreliable data (2.95–7.87) |
| 2011 | 4.91 (2.95–7.66) |
| 2012 | 5.46 (3.46–8.2) |
| 2013 | Unreliable data (1.69–5.43) |
| 2014 | 6.06 (3.99–8.81) |
| 2015 | 4.68 (2.86–7.23) |
| 2016 | 4.73 (2.96–7.16) |
| 2017 | 5.07 (3.18–7.68) |
| 2018 | 6.48 (4.37–9.25) |
| 2019 | 5.28 (3.38–7.85) |
| 2020 | 7.03 (4.81–9.92) |
| 2021 | 8.15 (5.74–11.24) |
| 2022 | 7.53 (5.19–10.58) |
| 2023 | 6.34 (4.18–9.22) |
| **Florida** |  |
| 1999 | 0.87 (0.7–1.04) |
| 2000 | 1.29 (1.08–1.49) |
| 2001 | 1.47 (1.26–1.68) |
| 2002 | 1.38 (1.18–1.59) |
| 2003 | 1.8 (1.57–2.07) |
| 2004 | 1.6 (1.39–1.81) |
| 2005 | 1.74 (1.52–1.96) |
| 2006 | 1.91 (1.68–2.14) |
| 2007 | 2.12 (1.89–2.36) |
| 2008 | 1.75 (1.54–1.96) |
| 2009 | 1.85 (1.64–2.07) |
| 2010 | 1.83 (1.62–2.05) |
| 2011 | 1.93 (1.71–2.14) |
| 2012 | 2.14 (1.91–2.37) |
| 2013 | 2.39 (2.15–2.63) |
| 2014 | 2.6 (2.35–2.84) |
| 2015 | 2.65 (2.41–2.89) |
| 2016 | 3.4 (3.12–3.67) |
| 2017 | 3.57 (3.3–3.85) |
| 2018 | 3.99 (3.71–4.28) |
| 2019 | 4.1 (3.82–4.39) |
| 2020 | 5.63 (5.3–5.07) |
| 2021 | 5.79 (5.44–613) |
| 2022 | 5.38 (5.06–5.7) |
| 2023 | 6.08 (5.74–6.42) |
| **Georgia** |  |
| 1999 | 1.26 (0.94–1.65) |
| 2000 | 1.48 (1.14–1.88) |
| 2001 | 1.69 (1.34–2.11) |
| 2002 | 1.75 (1.39–2.17 ) |
| 2003 | 2.25 (1.83–2.68) |
| 2004 | 1.86 (1.49–2.29) |
| 2005 | 1.89 (1.53–2.31) |
| 2006 | 1.9 (1.53–2.28) |
| 2007 | 1.93 (1.56–2.29) |
| 2008 | 1.78 (1.43–2.13) |
| 2009 | 1.93 (1.58–2.29) |
| 2010 | 1.96 (1.6–2.31) |
| 2011 | 2.26 (1.89–2.64) |
| 2012 | 2.38 (2–2.76) |
| 2013 | 2.48 (2.1–2.86) |
| 2014 | 1.93 (1.6–2.26) |
| 2015 | 2.12 (1.78–2.46) |
| 2016 | 3.04 (2.63–3.45) |
| 2017 | 3.47 (3.04–3.9) |
| 2018 | 3.61 (3.18–4.05) |
| 2019 | 4.08 (3.63–4.53) |
| 2020 | 5.10 (4.59–5.60) |
| 2021 | 6.45 (5.88–7.01) |
| 2022 | 6.12 (5.58–6.67) |
| 2023 | 6.81 (6.24–7.37) |
| **Hawaii** |  |
| 1999 | Unreliable data (0.87–2.79) |
| 2000 | 2.59 (1.6–3.95) |
| 2001 | 2.39 (1.46–3.69) |
| 2002 | 2.90 (1.87–4.27) |
| 2003 | 3.59 (2.44–5.09) |
| 2004 | 4.49 (3.2–6.22) |
| 2005 | 4.38 (3.13–5.96) |
| 2006 | 3.36 (2.3–4.75) |
| 2007 | 2.90 (1.93–4.19) |
| 2008 | 2.81 (1.87–4.06) |
| 2009 | 3.50 (2.44–4.87) |
| 2010 | 2.60 (1.71–3.78) |
| 2011 | 2.68 (1.78–3.87) |
| 2012 | 3.02 (2.08–4.24) |
| 2013 | 2.62 (1.71–3.83) |
| 2014 | 2.87 (1.9–4.14) |
| 2015 | 2.97 (2.04–4.17) |
| 2016 | 3.68 (2.64–4.99) |
| 2017 | 5.02 (3.76–6.57) |
| 2018 | 3.71 (2.67–5.01) |
| 2019 | 2.58 (1.73–3.7) |
| 2020 | 2.67 (1.84–3.75) |
| 2021 | 3.50 (2.55–4.69) |
| 2022 | 2.95 (2.11–4) |
| 2023 | 4.52 (3.44–5.83) |
| **Idaho** |  |
| 2004 | Unreliable data (0.71–2.41) |
| 2006 | Unreliable data (0.52–2.01) |
| 2007 | Unreliable data (0.48–1.86) |
| 2009 | Unreliable data (0.74–2.26) |
| 2010 | 1.97 (1.22–3.02) |
| 2011 | 2.35 (1.54–3.45) |
| 2012 | 2.07 (1.28–3.16) |
| 2013 | 2.19 (1.4–3.26) |
| 2014 | 2.98 (2.06–4.16) |
| 2015 | Unreliable data (0.91–2.5) |
| 2016 | 2.01 (1.3–2.96) |
| 2017 | 2.60 (1.8–3.63) |
| 2018 | 3.78 (2.8–5) |
| 2019 | 5.23 (4.05–6.64) |
| 2020 | 6.54 (5.23–8.05) |
| 2021 | 7.47 (6.05–8.89) |
| 2022 | 7.52 (6.09–8.95) |
| 2023 | 6.50 (5.20–7.81) |
| **Illinois** |  |
| 1999 | 1.50 (1.23–1.78) |
| 2000 | 1.63 (1.34–1.91) |
| 2001 | 1.59 (1.31–1.87) |
| 2002 | 1.81 (1.51–2.11) |
| 2003 | 1.70 (1.41–1.98) |
| 2004 | 1.71 (1.42–1.99) |
| 2005 | 1.63 (1.35–1.91) |
| 2006 | 1.86 (1.56–2.15) |
| 2007 | 1.78 (1.5–2.07) |
| 2008 | 1.83 (1.54–2.12) |
| 2009 | 2.09 (1.78–2.39) |
| 2010 | 1.77 (1.49–2.05) |
| 2011 | 1.69 (1.41–1.96) |
| 2012 | 2.00 (1.7–2.29) |
| 2013 | 2.09 (1.79–2.39) |
| 2014 | 2.18 (1.88–2.49) |
| 2015 | 2.41 (2.09–2.73) |
| 2016 | 2.40 (2.08–2.27) |
| 2017 | 2.23 (1.94–2.52) |
| 2018 | 2.43 (2.11–2.74) |
| 2019 | 2.58 (2.26–2.89) |
| 2020 | 3.55 (3.18–3.92) |
| 2021 | 3.7 (3.31–4.08) |
| 2022 | 4.00 (3.6–4.39) |
| 2023 | 3.44 (3.08–3.8) |
| **Indiana** |  |
| 1999 | 0.77 (0.52–1.11) |
| 2000 | 1.35 (1.01–1.77) |
| 2001 | 1.70 (1.31–2.15) |
| 2002 | 1.68 (1.3–2.13) |
| 2003 | 1.53 (1.18–1.96) |
| 2004 | 1.8 (1.42–2.26) |
| 2005 | 1.86 (1.47–2.32) |
| 2006 | 2.02 (1.61–2.49) |
| 2007 | 2.00 (1.59–2.47) |
| 2008 | 1.49 (1.15–1.89) |
| 2009 | 1.66 (1.31–2.08) |
| 2010 | 1.53 (1.18–1.94) |
| 2011 | 2.47 (2.02–2.92) |
| 2012 | 2.87 (2.38–3.36) |
| 2013 | 3.85 (3.29–4.41) |
| 2014 | 3.21 (2.7–3.72) |
| 2015 | 3.87 (3.32–4.42) |
| 2016 | 3.99 (3.44–4.55) |
| 2017 | 4.79 (4.18–5.41) |
| 2018 | 4.45 (3.87–5.04) |
| 2019 | 4.71 (4.11–5.31) |
| 2020 | 6.67 (5.97–7.38) |
| 2021 | 6.82 (6.11–7.53) |
| 2022 | 5.49 (4.85–6.13) |
| 2023 | 6.56 (5.87–7.26) |
| **Lowa** |  |
| 1999 | Unreliable data (0.24–0.91) |
| 2000 | Unreliable data (0.44–1.22) |
| 2001 | 1.11 (0.71–1.66) |
| 2002 | 0.93 (0.57–1.44) |
| 2003 | 0.94 (0.58–1.44) |
| 2004 | 0.91 (0.56–1.39) |
| 2005 | 1.51 (1.04–2.12) |
| 2006 | 1.18 (0.77–1.73) |
| 2007 | 1.93 (1.39–2.61) |
| 2008 | 2.05 (1.5–2.72) |
| 2009 | 1.86 (1.33–2.52) |
| 2010 | 2.04 (1.52–2.26) |
| 2011 | 1.82 (1.3–2.47) |
| 2012 | 2.07 (1.52–2.77) |
| 2013 | 2.6 (2–3.34) |
| 2014 | 2.39 (1.81–3.1) |
| 2015 | 2.5 (1.93–3.2) |
| 2016 | 3.15 (2.49–3.94) |
| 2017 | 2.95 (2.31–3.71) |
| 2018 | 2.99 (2.37–3.72) |
| 2019 | 4.58 (3.73–5.44) |
| 2020 | 4.71 (3.85–5.57) |
| 2021 | 5.92 (4.93–6.9) |
| 2022 | 6.22 (5.25–7.2) |
| 2023 | 5.37 (4.46–6.28) |
| **Kansas** |  |
| 1999 | 1.26 (0.79–1.19) |
| 2000 | Unreliable data (0.52–1.47) |
| 2001 | 1.12 (0.69–1.73) |
| 2002 | 1.66 (1.13–2.36) |
| 2003 | 2.17 (1.54–2.96) |
| 2004 | 1.62 (1.1–2.32) |
| 2005 | 1.43 (0.94–2.08) |
| 2006 | 1.54 (1.03–2.22) |
| 2007 | 1.45 (0.95–2.12) |
| 2008 | 1.54 (1.04–2.21) |
| 2009 | 1.02 (0.63–1.58) |
| 2010 | 1.34 (0.89–1.95) |
| 2011 | 1.6 (1.09–2.26) |
| 2012 | 1.73 (1.2–2.42) |
| 2013 | 1.61 (1.09–2.29) |
| 2014 | 1.44 (0.97–2.05) |
| 2015 | 2.05 (1.49–2.75) |
| 2016 | 2.64 (1.98–3,45) |
| 2017 | 3.02 (2.32–3.86) |
| 2018 | 2.63 (2–3.39) |
| 2019 | 4.63 (3.69–5.56) |
| 2020 | 4.67 (3.78–5.56) |
| 2021 | 5.22 (4.25– 6.19) |
| 2022 | 5.27 (4.31–6.22) |
| 2023 | 4.74 (3.82–5.66) |
| **Kentucky** |  |
| 1999 | 0.92 (0.58–1.37) |
| 2000 | 1.84 (1.35–2.43) |
| 2001 | 1.47 (1.04–2.43) |
| 2002 | 1.38 (0.98–1.9) |
| 2003 | 2.61 (2.04–3.29) |
| 2004 | 1.93 (1.44–2.53) |
| 2005 | 2.07 (1.57–2.68) |
| 2006 | 2.5 (1.95–3.15) |
| 2007 | 1.75 (1.31–2.3) |
| 2008 | 2.3 (1.79–2.91) |
| 2009 | 2.51 (1.98–3.14) |
| 2010 | 2.6 (2.06–3.25) |
| 2011 | 3.23 (2.59–3.87) |
| 2012 | 2.76 (2.22–3.4) |
| 2013 | 3.4 (2.77–4.04) |
| 2014 | 3.23 (2.62–3.84) |
| 2015 | 3.86 (3.2–4.52) |
| 2016 | 4.05 (3.38–4.72) |
| 2017 | 4.97 (4.22–5.72) |
| 2018 | 4.98 (4.23–5.73) |
| 2019 | 5.4 (4.63–6.17) |
| 2020 | 7.05 (6.17–7.94) |
| 2021 | 9.29 (8.27–10.32) |
| 2022 | 9.5 (8.46–10.54) |
| 2023 | 8.55 (7.59–9.51) |
| **Louisiana** |  |
| 1999 | 0.81 (0.51–1.23) |
| 2000 | 1.28 (0.89–1.78) |
| 2001 | 1.67 (1.22–2.23) |
| 2002 | 1.7 (1.26–2.26) |
| 2003 | 1.5 (1.09–2.03) |
| 2004 | 1.36 (0.98–1.85) |
| 2005 | 1.79 (1.34–2.34) |
| 2006 | 2.43 (1.9–3.07) |
| 2007 | 2.49 (1.95–5.15) |
| 2008 | 2.01 (1.54–2.59) |
| 2009 | 2.67 (2.13–3.32) |
| 2010 | 2.6 (2.06–3.24) |
| 2011 | 3.6 (2.94–4.25) |
| 2012 | 4.28 (3.56–5) |
| 2013 | 4.84 (4.09–5.59) |
| 2014 | 4.16 (3.47–4.86) |
| 2015 | 4.82 (4.07–5.56) |
| 2016 | 5.24 (4.48–6) |
| 2017 | 5.42 (4.64–6.2) |
| 2018 | 6.45 (5.6–7.3) |
| 2019 | 6.99 (6.11–7.86) |
| 2020 | 9.08 (8.07–10.08) |
| 2021 | 9.63 (8.59–10.68) |
| 2022 | 9.48 (8.46–10.51) |
| 2023 | 9.25 (8.24–10.27) |
| **Maine** |  |
| 2001 | 2.22 (1.38–3.4) |
| 2002 | Unreliable data (0.72–2.3) |
| 2003 | Unreliable data (0.93–2.63) |
| 2004 | Unreliable data (1.09–2.91) |
| 2006 | Unreliable data (0.85–2.51) |
| 2007 | Unreliable data (0.96–2.56) |
| 2008 | Unreliable data (0.78–2.31) |
| 2009 | 1.89 (1.15–2.91) |
| 2010 | 2.1 (1.33–3.15) |
| 2011 | Unreliable data (0.59–1.9) |
| 2012 | 1.77 (1.08–2.73) |
| 2013 | Unreliable data (0.9–2.33) |
| 2014 | Unreliable data (0.7–2.06) |
| 2015 | 1.55 (0.93–2.43) |
| 2016 | Unreliable data (0.85–2.27) |
| 2017 | 1.76 (1.12–2.65) |
| 2018 | 2.45 (1.67–3.48) |
| 2019 | 2.91 (2.06–4) |
| 2020 | 2.88 (1.99–4.02) |
| 2021 | 5.29 (4.1–6.72) |
| 2022 | 3.94 (2.91–5.22) |
| 2023 | 4.69 (3.57–6.05) |
| **Maryland** |  |
| 1999 | 1.88 (1.43–2.42) |
| 2000 | 3.11 (2.51–3.71) |
| 2001 | 2.75 (2.22–3.37) |
| 2002 | 2.46 (1.96–3.04) |
| 2003 | 2.46 (1.97–3.04) |
| 2004 | 2.74 (2.21–3.35) |
| 2005 | 2.89 (2.34–3.44) |
| 2006 | 2.68 (2.17–3.27) |
| 2007 | 3.13 (2.57–3.7) |
| 2008 | 2.73 (2.21–3.25) |
| 2009 | 2.99 (2.45–3.54) |
| 2010 | 2.87 (2.34–3.4) |
| 2011 | 2.84 (2.33–3.36) |
| 2012 | 3.29 (2.74–3.84) |
| 2013 | 3.15 (2.62–3.68) |
| 2014 | 3.02 (2.5–3.54) |
| 2015 | 3.07 (2.55–3.58) |
| 2016 | 3.46 (2.92–4.01) |
| 2017 | 3.76 (3.2–4.33) |
| 2018 | 4.4 (3.8–5.01) |
| 2019 | 5.76 (5.07–6.44) |
| 2020 | 7.67 (6.87–8.47) |
| 2021 | 9.2 (8.33–10.07) |
| 2022 | 7.54 (6.77–8.31) |
| 2023 | 7.03 (6.29–7.77) |
| **Massachusetts** |  |
| 1999 | 1.18 (0.87–1.55) |
| 2000 | 1.47 (1.13–1.88) |
| 2001 | 1.16 (0.86–1.53) |
| 2002 | 1.5 (1.16–1.9) |
| 2003 | 1.54 (1.2–1.95) |
| 2004 | 1.84 (1.46–2.29) |
| 2005 | 1.38 (1.06–1.77) |
| 2006 | 1.72 (1.36–2.14) |
| 2007 | 1.92 (1.54–2.37) |
| 2008 | 1.83 (1.46–2.26) |
| 2009 | 1.73 (1.37–2.15) |
| 2010 | 2.22 (1.8–2.64) |
| 2011 | 1.82 (1.45.2.25) |
| 2012 | 1.28 (0.98–1.63) |
| 2013 | 1.35 (1.06–1.71) |
| 2014 | 1.75 (1.41–2.41) |
| 2015 | 1.8 (1.45–2.21) |
| 2016 | 1.75 (1.41–2.14) |
| 2017 | 2.18 (1.78–2.58) |
| 2018 | 1.95 (1.57–2.32) |
| 2019 | 2.05 (1.67–2.43) |
| 2020 | 2.5 (2.09–2.91) |
| 2021 | 3.02 (2.56–3.48) |
| 2022 | 2.61 (2.19–3.03) |
| 2023 | 2.95 (2.51–3.39) |
| **Michigan** |  |
| 1999 | 1.45 (1.16–1.78) |
| 2000 | 2.06 (1.71–2.41) |
| 2001 | 1.85 (1.52–2.18) |
| 2002 | 2.12 (1.77–2.47) |
| 2003 | 2.18 (1.82–2.54) |
| 2004 | 1.98 (1.64–2.32) |
| 2005 | 1.91 (1.58–2.24) |
| 2006 | 2.18 (1.83–2.53) |
| 2007 | 2.34 (1.98–2.7) |
| 2008 | 2.69 (2.31–3.07) |
| 2009 | 2.97 (2.57–3.37) |
| 2010 | 2.63 (2.25–3) |
| 2011 | 3.06 (2.66–3.46) |
| 2012 | 2.85 (2.47–3.24) |
| 2013 | 2.91 (2.53–3.3) |
| 2014 | 2.86 (2.47–3.24) |
| 2015 | 3.14 (2.74–3.54) |
| 2016 | 2.98 (2.59–3.38) |
| 2017 | 2.97 (2.59–3.36) |
| 2018 | 3.23 (2.82–3.64) |
| 2019 | 3.45 (3.03–3.86) |
| 2020 | 4.49 (4.02–4.97) |
| 2021 | 4.95 (4.45–5.45) |
| 2022 | 5.27 (4.77–5.77) |
| 2023 | 4.18 (3.73–4.62) |
| **Minnesota** |  |
| 1999 | 0.77 (0.5–1.15) |
| 2000 | 1.01 (0.69–1.42) |
| 2001 | 1.41 (1.03–1.88) |
| 2002 | 1.84 (1.4–2.38) |
| 2003 | 1.96 (1.5–2.51) |
| 2004 | 1.84 (1.4–2.37) |
| 2005 | 1.93 (1.49–2.46) |
| 2006 | 2.25 (1.78–2.81) |
| 2007 | 2.27 (1.8–2.83) |
| 2008 | 2.13 (1.67–2.67) |
| 2009 | 2.48 (1.99–3.05) |
| 2010 | 2.5 (2.03–3.05) |
| 2011 | 3.05 (2.49–3.6) |
| 2012 | 3.2 (2.63–3.77) |
| 2013 | 3.86 (3.24–4.48) |
| 2014 | 4.28 (3.64–4.93) |
| 2015 | 4.65 (3.98–5.31) |
| 2016 | 4.77 (4.1–5.43) |
| 2017 | 4.84 (4.17–5.5) |
| 2018 | 6.73 (5.94–7.51) |
| 2019 | 7 (6.21–7.79) |
| 2020 | 8.63 (7.75–9.51) |
| 2021 | 10.46 (9.48–11.45) |
| 2022 | 9.87 (8.94–10.8) |
| 2023 | 9.81 (8.89–10.74) |
| **Mississippi** |  |
| 1999 | Unreliable data (0.35–1.19) |
| 2000 | 2.65 (1.95–3.53) |
| 2001 | 2.2 (1.56–3) |
| 2002 | 3.12 (2.35–4.05) |
| 2003 | 2.16 (1.54–2.94) |
| 2004 | 4.27 (3.39–5.32) |
| 2005 | 3.82 (2.98–4.82) |
| 2006 | 3.51 (2.72–4.45) |
| 2007 | 3.6 (2.8–4.56) |
| 2008 | 3.71 (2.91–4.66) |
| 2009 | 3.93 (3.11–4.89) |
| 2010 | 3.5 (2.74–4.42) |
| 2011 | 4.81 (3.85–5.76) |
| 2012 | 4.22 (3.39–5.2) |
| 2013 | 4.45 (3.6–5.44) |
| 2014 | 4.72 (3.79–5.64) |
| 2015 | 5.33 (4.38–6.29) |
| 2016 | 6.01 (4.99–7.04) |
| 2017 | 6.07 (5.05–7.08) |
| 2018 | 6.69 (5.62–7.77) |
| 2019 | 7.27 (6.16–8.39) |
| 2020 | 11.97 (10.52–13.42) |
| 2021 | 14.83 (13.24–16.42) |
| 2022 | 13.25 (11.76–14.74) |
| 2023 | 12.09 (10.67–13.52) |
| **Missouri** |  |
| 1999 | 1.11 (0.8–1.5) |
| 2000 | 1.55 (1.18–2) |
| 2001 | 1.27 (0.94–1.68) |
| 2002 | 1.78 (1.39–2.25) |
| 2003 | 2.17 (1.73–2.68) |
| 2004 | 2 (1.58–2.49) |
| 2005 | 1.89 (1.5–2.35) |
| 2006 | 1.8 (1.41–2.26) |
| 2007 | 1.96 (1.55–2.43) |
| 2008 | 1.85 (1.47–2.31) |
| 2009 | 2.03 (1.63–2.5) |
| 2010 | 1.58 (1.24–2) |
| 2011 | 1.67 (1.31–2.09) |
| 2012 | 1.95 (1.56–2.41) |
| 2013 | 2.17 (1.74–2.6) |
| 2014 | 1.96 (1.57–2.42) |
| 2015 | 2.45 (2.01–2.9) |
| 2016 | 2.51 (2.05–2.97) |
| 2017 | 2.63 (2.17–3.09) |
| 2018 | 3.06 (2.56–3.56) |
| 2019 | 2.91 (2.43–3.39) |
| 2020 | 3.47 (2.94–3.99) |
| 2021 | 4.9 (4.26–5.54) |
| 2022 | 5.39 (4.73–6.05) |
| 2023 | 4.8 (4.2–5.41) |
| **Montana** |  |
| 2002 | Unreliable data (0.74–2.88) |
| 2003 | Unreliable data (1.03–3.32) |
| 2005 | Unreliable data (1.43–3.94) |
| 2008 | 3.12 (1.85–4.93) |
| 2009 | Unreliable data (1.38–3.78) |
| 2010 | Unreliable data (1.18–3.36) |
| 2011 | Unreliable data (1.48–4.08) |
| 2012 | Unreliable data (0.98–3.02) |
| 2013 | 3.17 (1.99–4.8) |
| 2014 | Unreliable data (1.39–3.71) |
| 2015 | 3.06 (1.96–4.55) |
| 2016 | Unreliable data (1.07–3.3) |
| 2017 | 3.77 (2.56–5.36) |
| 2018 | 2.02 (1.23–3.12) |
| 2019 | 3.24 (2.03–4.9) |
| 2020 | 5.18 (3.72–7.03) |
| 2021 | 6.71 (5.1–8.65) |
| 2022 | 7.66 (5.87–9.81) |
| 2023 | 4.74 (3.37–6.48) |
| **Nebraska** |  |
| 2000 | Unreliable data (0.72–2.13) |
| 2001 | Unreliable data (0.8–2.27) |
| 2002 | Unreliable data (0.79–2.25) |
| 2003 | Unreliable data (0.47–1.67) |
| 2004 | 1.79 (1.11–2.73) |
| 2005 | 2.58 (1.75–3.66) |
| 2006 | 2.54 (1.74–3.59) |
| 2007 | 2.23 (1.47–3.25) |
| 2008 | 2.59 (1.77–3.66) |
| 2009 | 3.15 (2.27–4.25) |
| 2010 | 2.9 (2.04–4) |
| 2011 | 2.22 (1.5–3.17) |
| 2012 | 2.74 (1.92–3.79) |
| 2013 | 3.34 (2.42–4.5) |
| 2014 | 2.34 (1.6–3.31) |
| 2015 | 3.22 (2.36–4.3) |
| 2016 | 4.65 (3.59–5.93) |
| 2017 | 4.27 (3.26–5.5) |
| 2018 | 4.6 (3.57–5.83) |
| 2019 | 4.92 (3.85–6.2) |
| 2020 | 5.27 (4.16–6.59) |
| 2021 | 7.56 (6.14–8.97) |
| 2022 | 7.84 (6.42–9.25) |
| 2023 | 7.84 (6.44–9.24) |
| **Nevada** |  |
| 1999 | 1.73 (1.08–2.62) |
| 2000 | 2.06 (1.32–3.06) |
| 2001 | 2.26 (1.52–3.25) |
| 2002 | 1.53 (0.96–2.32) |
| 2003 | 1.98 (1.3–2.88) |
| 2004 | 1.86 (1.21–2.75) |
| 2005 | 1.79 (1.16–2.65) |
| 2006 | 2.03 (1.38–2.88) |
| 2007 | 2.2 (1.55–3.04) |
| 2008 | 1.81 (1.23–2.57) |
| 2009 | 1.36 (0.87–2.02) |
| 2010 | 2.06 (1.45–2.84) |
| 2011 | 2.73 (2.02–3.61) |
| 2012 | 2.77 (2.07–3.62) |
| 2013 | 2.99 (2.27–3.85) |
| 2014 | 2.37 (1.75–3.13) |
| 2015 | 3.21 (2.49–4.08) |
| 2016 | 2.66 (2–3.46) |
| 2017 | 3.54 (2.79–4.43) |
| 2018 | 4.04 (3.27–4.95) |
| 2019 | 3.18 (2.5–3.99) |
| 2020 | 3.44 (2.74–4.27) |
| 2021 | 6.93 (5.87–8) |
| 2022 | 5.84 (4.89–6.79) |
| 2023 | 7.45 (6.39–8.52) |
| **New Hampshire** |  |
| 1999 | Unreliable data (0.82–2.77) |
| 2000 | Unreliable data (0.62–2.38) |
| 2001 | Unreliable data (0.97–2.98) |
| 2002 | Unreliable data (0.74–2.49) |
| 2003 | Unreliable data (0.55–2.12) |
| 2004 | Unreliable data (0.83–2.55) |
| 2005 | Unreliable data (0.87–2.67) |
| 2006 | Unreliable data (0.93–2.74) |
| 2007 | Unreliable data (1.01–2.77) |
| 2008 | Unreliable data (1.04–2.94) |
| 2009 | Unreliable data (1.13–2.94) |
| 2010 | 2.38 (1.49–3.61) |
| 2011 | 2.04 (1.28–3.09) |
| 2012 | Unreliable data (0.85–25) |
| 2013 | 2.61 (1.76–3.72) |
| 2014 | 2.13 (1.35–3.19) |
| 2015 | 2.31 (1.54–3.34) |
| 2016 | 2.88 (1.97–4.07) |
| 2017 | 2.88 (1.98–4.05) |
| 2018 | 2.57 (1.74–3.67) |
| 2019 | 3.09 (2.16–4.4) |
| 2020 | 2.19 (1.47–3.14) |
| 2021 | 3.46 (2.5–4.66) |
| 2022 | 3.88 (2.87–5.13) |
| 2023 | 3.79 (2.81–4.99) |
| **New Jersey** |  |
| 1999 | 1.01 (0.76–1.31) |
| 2000 | 1.3 (1.01–1.63) |
| 2001 | 1.64 (1.32–2) |
| 2002 | 1.4 (1.11–1.73) |
| 2003 | 1.37 (1.08–1.7) |
| 2004 | 1.45 (1.16–1.79) |
| 2005 | 1.59 (1.29–1.95) |
| 2006 | 1.61 (1.3–1.93) |
| 2007 | 1.45 (1.16–1.78) |
| 2008 | 1.93 (1.59–2.27) |
| 2009 | 1.4 (1.12–1.72) |
| 2010 | 2.27 (1.9–2.64) |
| 2011 | 3 (2.58–3.42) |
| 2012 | 3.22 (2.78–3.66) |
| 2013 | 2.81 (2.41–3.22) |
| 2014 | 3.2 (2.77–3.63) |
| 2015 | 2.6 (2.21–2.99) |
| 2016 | 2.96 (2.55–3.36) |
| 2017 | 2.51 (2.15–2.88) |
| 2018 | 2.88 (2.48–3.27) |
| 2019 | 2.83 (2.44–3.21) |
| 2020 | 3.56 (3.31–4) |
| 2021 | 2.93 (2.53–3.33) |
| 2022 | 2.89 (2.5–3.27) |
| 2023 | 3.38 (2.96–3.70) |
| **New Mexico** |  |
| 2000 | 2.37 (1.55–3.47) |
| 2001 | 2.12 (1.36–3.15) |
| 2002 | 2.37 (1.58–3.43) |
| 2003 | 2.05 (1.33–3.02) |
| 2004 | 1.83 (1.15–2.77) |
| 2005 | 2.13 (1.41–3.1) |
| 2006 | 1.94 (1.26–2.87) |
| 2007 | 2.39 (1.65–3.36) |
| 2008 | 3.01 (2.16–4.08) |
| 2009 | 2.36 (1.64–3.3) |
| 2010 | 3.19 (2.33–4.27) |
| 2011 | 3.3 (2.42–4.38) |
| 2012 | 4.02 (3.07–5.17) |
| 2013 | 4.28 (3.3–5.46) |
| 2014 | 3.39 (2.54–4.43) |
| 2015 | 4.96 (3.91–6.21) |
| 2016 | 4.05 (3.11–5.18) |
| 2017 | 3.42 (2.6–4.42) |
| 2018 | 4.29 (3.33–5.43) |
| 2019 | 5.19 (4.16–6.4) |
| 2020 | 6.47 (5.24–7.7) |
| 2021 | 8.44 (7.02–9.86) |
| 2022 | 7.41 (6.12–8.71) |
| 2023 | 11.52 (9.86–13.19) |
| **New York** |  |
| 1999 | 1.1 (0.91–1.29) |
| 2000 | 1.73 (1.5–1.96) |
| 2001 | 1.91 (1.67–2.15) |
| 2002 | 1.98 (1.73–2.22) |
| 2003 | 1.95 (1.71–2.18) |
| 2004 | 1.94 (1.7–2.18) |
| 2005 | 1.95 (1.72–2.19) |
| 2006 | 1.77 (1.54–2) |
| 2007 | 2.2 (1.95–2.45) |
| 2008 | 2.2 (1.96–2.45) |
| 2009 | 2.35 (2.1–2.61) |
| 2010 | 2.55 (2.29–2.82) |
| 2011 | 2.63 (2.37–2.9)) |
| 2012 | 2.83 (2.56–3.11) |
| 2013 | 2.45 (2.2–2.7) |
| 2014 | 2.47 (2.22–2.72) |
| 2015 | 2.37 (2.12–2.61) |
| 2016 | 2.39 (2.14–2.63) |
| 2017 | 2.87 (2.6–3.13) |
| 2018 | 2.83 (2.57–3.1) |
| 2019 | 3.13 (2.85–3.41) |
| 2020 | 3.96 (3.65–4.27) |
| 2021 | 4.02 (3.71–4.33) |
| 2022 | 4.28 (3.96–4.59) |
| 2023 | 4.1 (3.8–4.41) |
| **North Carolina** |  |
| 1999 | 1.56 (1.23–1.95) |
| 2000 | 2.19 (1.78–2.6) |
| 2001 | 2.34 (1.93–2.76) |
| 2002 | 2.15 (1.76–2.55) |
| 2003 | 2.54 (2.12–2.97) |
| 2004 | 2.53 (2.11–2.95) |
| 2005 | 2.42 (2.02–2.82) |
| 2006 | 2.8 (2.38–3.23) |
| 2007 | 2.83 (2.41–3.24) |
| 2008 | 3.17 (2.73–3.61) |
| 2009 | 3.21 (2.77–3.64) |
| 2010 | 3.21 (2.78–3.65) |
| 2011 | 3.19 (2.77–3.61) |
| 2012 | 3.29 (2.86–3.72) |
| 2013 | 3.93 (3.47–4.38) |
| 2014 | 2.62 (2.25–2.99) |
| 2015 | 2.98 (2.59–3.37) |
| 2016 | 2.67 (2.3–3.04) |
| 2017 | 2.82 (2.45–3.19) |
| 2018 | 2.75 (2.39–3.12) |
| 2019 | 3.1 (2.72–3.47) |
| 2020 | 3.85 (3.44–4.27) |
| 2021 | 4.92 (4.44–5.4) |
| 2022 | 5.92 (5.41–6.43) |
| 2023 | 5.96 (5.45–6.47) |
| **North Dakota** |  |
| 2003 | Unreliable data (2.1 2–6.03) |
| 2004 | 4.47 (2.73–6.91) |
| 2005 | Unreliable data (0.98–3.76) |
| 2006 | Unreliable data (1.28–4.6) |
| 2008 | Unreliable data (1.39–4.28) |
| 2009 | Unreliable data (1.43–4.38) |
| 2010 | Unreliable data (1.6–4.9) |
| 2011 | Unreliable data (1.77–5.23) |
| 2012 | Unreliable data (1.63–5.01) |
| 2013 | Unreliable data (0.87–3.6) |
| 2014 | Unreliable data (1.32–4.23) |
| 2015 | 4.48 (2.81–6.78) |
| 2016 | 3.96 (2.42–6.11) |
| 2017 | Unreliable data (1.1–3.94) |
| 2018 | Unreliable data (1.99–5.47) |
| 2019 | 4.76 (3.02–7.14) |
| 2020 | 5.09 (3.36–7.41) |
| 2021 | 7.56 (5.38–10.34) |
| 2022 | 6.98 (4.98–9.5) |
| 2023 | 10.52 (7.96–13.63) |
| **Ohio** |  |
| 1999 | 1.82 (1.51–2.12) |
| 2000 | 2.06 (1.73–2.38) |
| 2001 | 2.5 (2.15–2.85) |
| 2002 | 2.75 (2.38–3.11) |
| 2003 | 2.88 (2.5–3.25) |
| 2004 | 3.12 (2.74–3.51) |
| 2005 | 3.17 (2.78–3.56) |
| 2006 | 3.92 (3.49–4.35) |
| 2007 | 3.98 (3.55–4.41) |
| 2008 | 4.23 (3.79–4.67) |
| 2009 | 3.76 (3.35–4.17) |
| 2010 | 3.84 (3.43–4.26) |
| 2011 | 3.8 (3.39–4.21) |
| 2012 | 3.78 (3.37–4.19) |
| 2013 | 3.99 (3.57–4.41) |
| 2014 | 3.98 (3.57–4.4) |
| 2015 | 3.55 (3.16–3.94) |
| 2016 | 3.49 (3.11–3.88) |
| 2017 | 4.03 (3.61–4.45) |
| 2018 | 3.76 (3.36–4.15) |
| 2019 | 4.23 (3.82–4.65) |
| 2020 | 4.95 (4.5–5.41) |
| 2021 | 5.35 (4.88–5.82) |
| 2022 | 5.38 (4.91–5.85) |
| 2023 | 5.63 (5.15–6.11) |
| **Oklahoma** |  |
| 1999 | Unreliable data (0.48–1.27) |
| 2000 | 1.88 (1.36–2.53) |
| 2001 | 1.95 (1.42–2.61) |
| 2002 | 2.38 (1.8–3.09) |
| 2003 | 3.2 (2.52–4.02) |
| 2004 | 3.03 (2.38–3.8) |
| 2005 | 2.93 (2.29–3.69) |
| 2006 | 3.58 (2.86–4.41) |
| 2007 | 3.26 (2.59–4.04) |
| 2008 | 3.69 (2.99–4.52) |
| 2009 | 3.77 (3.05–4.6) |
| 2010 | 4.4 (3.58–5.22) |
| 2011 | 5.3 (4.42–6.18) |
| 2012 | 6.99 (6–7.98) |
| 2013 | 6.99 (6–7.97) |
| 2014 | 7.8 (6.76–8.85) |
| 2015 | 9.55 (8.43–10.68) |
| 2016 | 11.82 (10.56–13.08) |
| 2017 | 13.01 (11.67–14.35) |
| 2018 | 16.82 (15.31–18.32) |
| 2019 | 16.48 (15.02–17.94) |
| 2020 | 20.57 (18.91–22.22) |
| 2021 | 23.4 (21.64–25.16) |
| 2022 | 25.34 (23.52–27.16) |
| 2023 | 21.54 (19.88–23.20) |
| **Oregon** |  |
| 1999 | 0.89 (0.54–1.38) |
| 2000 | 1.05 (0.67–1.56) |
| 2001 | 1.53 (1.07–2.12) |
| 2002 | 0.98 (0.63–1.46) |
| 2003 | 1.51 (1.07–2.08) |
| 2004 | 1.8 (1.31–2.4) |
| 2005 | 1.87 (1.37–2.48) |
| 2006 | 1.81 (1.34–2.4) |
| 2007 | 2.04 (1.54–2.66) |
| 2008 | 2.72 (2.14–3.4) |
| 2009 | 2.44 (1.89–3.1) |
| 2010 | 2.48 (1.94–3.13) |
| 2011 | 2.31 (1.79–2.93) |
| 2012 | 3.44 (2.77–4.11) |
| 2013 | 2.5 (1.98–3.13) |
| 2014 | 2.72 (2.17–3.36) |
| 2015 | 3.38 (2.75–4.02) |
| 2016 | 3.47 (2.84–4.11) |
| 2017 | 3.33 (2.71–3.95) |
| 2018 | 4.74 (4–5.48) |
| 2019 | 4.47 (3.77–5.16) |
| 2020 | 6.56 (5.71–7.41) |
| 2021 | 8.98 (7.99–9.97) |
| 2022 | 9.51 (8.51–10.51) |
| 2023 | 9.99 (8.97–11.01) |
| **Pennsylvania** |  |
| 1999 | 1.25 (1.02–1.48) |
| 2000 | 1.73 (1.46–2) |
| 2001 | 1.89 (1.61–2.17) |
| 2002 | 2 (1.71–2.28) |
| 2003 | 2.24 (1.93–2.54) |
| 2004 | 1.79 (1.52–2.06) |
| 2005 | 2.04 (1.76–2.33) |
| 2006 | 2.13 (1.84–2.42) |
| 2007 | 2.31 (2.01–2.61) |
| 2008 | 2.25 (1.95–2.55) |
| 2009 | 2.37 (2.06–2.67) |
| 2010 | 2.53 (2.21–2.84) |
| 2011 | 2.03 (1.75–2.3) |
| 2012 | 2.71 (2.39–3.02) |
| 2013 | 2.58 (2.27–2.89) |
| 2014 | 2.69 (2.37–3.01) |
| 2015 | 2.74 (2.42–3.06) |
| 2016 | 2.74 (2.42–3.05) |
| 2017 | 2.68 (2.37–2.99) |
| 2018 | 3.19 (2.84–3.53) |
| 2019 | 3.14 (2.8–3.47) |
| 2020 | 4.49 (4.09–4.89) |
| 2021 | 5.06 (4.63–5.49) |
| 2022 | 4.96 (4.54–5.38) |
| 2023 | 5.46 (5.03–5.9) |
| **Rhode Island** |  |
| 1999 | Unreliable data (1.03–3.16) |
| 2000 | Unreliable data (0.94–3.01) |
| 2001 | Unreliable data (1.22–3.47) |
| 2002 | 2.87 (1.78–4.39) |
| 2003 | 3.87 (2.59–5.55) |
| 2004 | 5.26 (3.76–7.17) |
| 2005 | 4.47 (3.06–6.31) |
| 2006 | 3.97 (2.72–5.61) |
| 2007 | 3.15 (2.02–4.69) |
| 2008 | Unreliable data (1.32–3.62) |
| 2009 | 2.49 (1.52–3.85) |
| 2010 | 2.94 (1.88–4.38) |
| 2011 | 4.46 (3.11–6.2) |
| 2012 | 3.7 (2.5–5.29) |
| 2013 | 7.25 (5.15–9.37) |
| 2014 | 6.76 (5.08–8.82) |
| 2015 | 6.74 (5.07–8.77) |
| 2016 | 7.32 (5.58–9.45) |
| 2017 | 6.53 (4.89–8.55) |
| 2018 | 7.68 (5.99–9.7) |
| 2019 | 6.77 (5.08–8.83) |
| 2020 | 8.66 (6.74–10.96) |
| 2021 | 6.4 (4.88–8.23) |
| 2022 | 12.13 (9.89–14.37) |
| 2023 | 12.5 (10.2–14.8) |
| **South Carolina** |  |
| 1999 | 1.46 (1.03–2) |
| 2000 | 2.82 (2.22–3.55) |
| 2001 | 2 (1.5–2.62) |
| 2002 | 1.76 (1.29–2.33) |
| 2003 | 2.17 (1.66–2.8) |
| 2004 | 2.06 (1.56–2.67) |
| 2005 | 2.36 (1.82–3.01) |
| 2006 | 2.83 (2.26–3.49) |
| 2007 | 2.98 (2.4–3.65) |
| 2008 | 2.74 (2.19–3.38) |
| 2009 | 2.78 (2.24–3.41) |
| 2010 | 2.32 (1.83–2.9) |
| 2011 | 3.06 (2.48–3.64) |
| 2012 | 2.96 (2.38–3.54) |
| 2013 | 3.58 (2.95–4.2) |
| 2014 | 3.29 (2.71–3.87) |
| 2015 | 3.18 (2.6–3.76) |
| 2016 | 3.95 (3.33–4.56) |
| 2017 | 4.29 (3.65–4.93) |
| 2018 | 4.29 (3.65–4.93) |
| 2019 | 5.31 (4.61–6) |
| 2020 | 6.38 (5.63–7.13) |
| 2021 | 10.77 (9.77–11.77) |
| 2022 | 12.32 (11.29–13.36) |
| 2023 | 13.79 (12.70–14.88) |
| **South Dakota** |  |
| 2007 | Unreliable data (1.24–3.81) |
| 2009 | Unreliable data (1.28–3.77) |
| 2010 | Unreliable data (0.75–2.88) |
| 2011 | Unreliable data (0.94–3.6) |
| 2012 | Unreliable data (1.52–4.18) |
| 2013 | Unreliable data (1.64–4.51) |
| 2014 | Unreliable data (1.78–4.75) |
| 2015 | 3.19 (1.98–4.88) |
| 2016 | 3.65 (2.34–5.43) |
| 2017 | 3.82 (2.47–5.64) |
| 2018 | 5.81 (4.07–8.05) |
| 2019 | 4.85 (3.25–6.07) |
| 2020 | 8.25 (6.22–10.74) |
| 2021 | 10.18 (7.78–13.07) |
| 2022 | 10.7 (8.31–13.57) |
| 2023 | 8.66 (6.51–11.3) |
| **Tennessee** |  |
| 1999 | 1.54 (1.17–2) |
| 2000 | 1.77 (1.37–2.26) |
| 2001 | 2.07 (1.64–2.59) |
| 2002 | 2.1 (1.67–2.61) |
| 2003 | 2.85 (2.32–3.38) |
| 2004 | 2.37 (1.91–2.9) |
| 2005 | 2.47 (2.00–3.01) |
| 2006 | 2.49 (2.01–2.97) |
| 2007 | 2.45 (1.98–2.92) |
| 2008 | 3.07 (2.55–3.59) |
| 2009 | 3.25 (2.72–3.78) |
| 2010 | 3.03 (2.53–3.54) |
| 2011 | 3.66 (3.11–4.22) |
| 2012 | 3.53 (2.99–4.06) |
| 2013 | 3.87 (3.31–4.42) |
| 2014 | 3.89 (3.34–4.44) |
| 2015 | 4.17 (3.59–4.75) |
| 2016 | 5.19 (4.57–5.82) |
| 2017 | 4.63 (4.04–5.220 |
| 2018 | 5.12 (4.51–5.73) |
| 2019 | 6.5 (5.83–7.18) |
| 2020 | 7.99 (7.23–8.75) |
| 2021 | 8.76 (7.97–9.56) |
| 2022 | 9.2 (8.39–10) |
| 2023 | 8.9 (8.13–9.68) |
| **Texas** |  |
| 1999 | 1.4 (1.18–1.62) |
| 2000 | 2.23 (1.96–2.51) |
| 2001 | 2.74 (2.43–3.04) |
| 2002 | 2.76 (2.46–3.06) |
| 2003 | 2.98 (2.67–3.29) |
| 2004 | 3.08 (2.76–3.39) |
| 2005 | 3.18 (2.87–3.49) |
| 2006 | 3.33 (3.02–3.64) |
| 2007 | 3.6 (3.28–3.92) |
| 2008 | 3.87 (3.54–4.19) |
| 2009 | 4.28 (3.94–4.62) |
| 2010 | 4.71 (4.36–5.06) |
| 2011 | 5 (4.64–5.35) |
| 2012 | 5.55 (5.18–5.92) |
| 2013 | 5.9 (5.53–6.27) |
| 2014 | 6.26 (5.88–6.64) |
| 2015 | 6.12 (5.75–6.49) |
| 2016 | 6.52 (6.14–6.9) |
| 2017 | 7.18 (6.79–7.57) |
| 2018 | 7.45 (7.06–7.85) |
| 2019 | 7.39 (7.01–7.78) |
| 2020 | 9.15 (8.73–9.58) |
| 2021 | 10.2 ( 9.75–10.65) |
| 2022 | 10.41 (9.96–10.85) |
| 2023 | 9.95 (9.52–10.38) |
| **Utah** |  |
| 2002 | Unreliable data (0.73–2.14) |
| 2003 | Unreliable data (0.73–2.23) |
| 2005 | Unreliable data (0.82–2.25) |
| 2007 | Unreliable data (0.34–1.31) |
| 2009 | Unreliable data (0.48–1.54) |
| 2010 | Unreliable data (0.82–2.12) |
| 2011 | 1.51 (0.93–2.31) |
| 2012 | Unreliable data (0.52–1.55) |
| 2013 | 1.67 (1.08–2.46) |
| 2014 | 1.51 (0.95–2.26) |
| 2015 | 1.68 (1.12–2.43) |
| 2016 | 1.37 (0.89–2.02) |
| 2017 | 2.32 (1.66–3.16) |
| 2018 | 2.14 (1.51–2.95) |
| 2019 | 2.03 (1.43–2.79) |
| 2020 | 2.91 (2.18–3.81) |
| 2021 | 3.61 (2.8–4.58) |
| 2022 | 3.29 (2.52–4.21) |
| 2023 | 3.41 (2.64–4.33) |
| **Vermont** |  |
| 2003 | Unreliable data (1.28–4.6) |
| 2004 | Unreliable data (1.48–4.99) |
| 2005 | 4.34 (2.65–6.7) |
| 2006 | 5.2 (3.33–7.73) |
| 2007 | 4.39 (2.68–6.78) |
| 2008 | Unreliable data (1.21–4.1) |
| 2009 | Unreliable data (1.69–4.99) |
| 2010 | Unreliable data (2.2–5.88) |
| 2011 | Unreliable data (1.93–5.48) |
| 2012 | Unreliable data (1.72–4.89) |
| 2013 | Unreliable data (2.1–5.61) |
| 2014 | Unreliable data (1.46–4.48) |
| 2015 | 3.65 (2.23–5.64) |
| 2016 | 3.13 (1.89–4.89) |
| 2017 | 5.49 (3.65–7.94) |
| 2018 | 3.48 (2.12–5.37) |
| 2019 | 5.17 (3.49–7.38) |
| 2020 | 4.1 (2.68–6.01) |
| 2021 | 4.63 (2.97–6.89) |
| 2022 | 7.26 (5.25–9.78) |
| 2023 | 6.63 (4.79–8.92) |
| **Virginia** |  |
| 1999 | 0.86 (0.6–1.19) |
| 2000 | 1.24 (0.93–1.62) |
| 2001 | 1.31 (0.99–1.7) |
| 2002 | 1.59 (1.24–2.01) |
| 2003 | 1.8 (1.42–2.24) |
| 2004 | 1.52 (1.18–1.92) |
| 2005 | 1.82 (1.46–2.24) |
| 2006 | 1.69 (1.34–2.09) |
| 2007 | 1.55 (1.23–1.94) |
| 2008 | 1.59 (1.27–1.98) |
| 2009 | 2.01 (1.63–2.4) |
| 2010 | 1.86 (1.49–2.22) |
| 2011 | 1.87 (1.51–2.24) |
| 2012 | 2.08 (1.7–2.46) |
| 2013 | 2.06 (1.69–2.43) |
| 2014 | 1.71 (1.37–2.04) |
| 2015 | 2.46 (2.07–2.86) |
| 2016 | 2.47 (2.08–2.87) |
| 2017 | 2.28 (1.9–2.66) |
| 2018 | 2.2 (1.84–2.56) |
| 2019 | 2.73 (2.33–3.13) |
| 2020 | 4.1 (3.61–4.59) |
| 2021 | 4.78 (4.25–5.31) |
| 2022 | 5.4 (4.85–5.95) |
| 2023 | 5.65 (5.1–6.2) |
| **Washington** |  |
| 1999 | 0.82 (0.55–1.18) |
| 2000 | 1.53 (1.15–1.99) |
| 2001 | 1.54 (1.16–1.99) |
| 2002 | 2.1 (1.65–2.62) |
| 2003 | 2.35 (1.89–2.89) |
| 2004 | 2.65 (2.14–3.16) |
| 2005 | 2.14 (1.71–2.65) |
| 2006 | 2.65 (2.15–3.14) |
| 2007 | 2.21 (1.78–2.7) |
| 2008 | 2.21 (1.77–2.65) |
| 2009 | 2.58 (2.11–3.05) |
| 2010 | 3.04 (2.54–3.54) |
| 2011 | 3.63 (3.09–4.17) |
| 2012 | 3.32 (2.8–3.84) |
| 2013 | 4.02 (3.47–4.57) |
| 2014 | 3.54 (3.03–4.05) |
| 2015 | 3.69 (3.16–4.21) |
| 2016 | 3.74 (3.21–4.27) |
| 2017 | 3.78 (3.26–4.3) |
| 2018 | 4.05 (3.53–4.57) |
| 2019 | 4.8 (4.23–5.38) |
| 2020 | 6.15 (5.51–6.79) |
| 2021 | 6.53 (5.87–7.19) |
| 2022 | 7.38 (6.69–8.07) |
| 2023 | 6.49 (5.85–7.14) |
| **West Virginia** |  |
| 1999 | 1.6 (1–2.43) |
| 2000 | 2.91 (2.08–3.96) |
| 2001 | 2.32 (1.59–3.28) |
| 2002 | 3.15 (2.27–4.26) |
| 2003 | 3.66 (2.73–4.81) |
| 2004 | 4.43 (3.41–5.65) |
| 2005 | 3.32 (2.44–4.42) |
| 2006 | 3.48 (2.58–4.59) |
| 2007 | 3.89 (2.94–5.06) |
| 2008 | 2.84 (2.04–3.86) |
| 2009 | 4.21 (3.24–5.38) |
| 2010 | 4.73 (3.68–5.99) |
| 2011 | 3.66 (2.74–4.79) |
| 2012 | 4.26 (3.28–5.44) |
| 2013 | 3.82 (2.9–4.93) |
| 2014 | 4.28 (3.28–5.49) |
| 2015 | 5.36 (4.24–6.68) |
| 2016 | 5.15 (4.07–6.43) |
| 2017 | 5.54 (4.4–6.89) |
| 2018 | 4.96 (3.92–6.2) |
| 2019 | 5.66 (4.51–7.02) |
| 2020 | 7.57 (6.19–8.95) |
| 2021 | 8.45 (7–9.9) |
| 2022 | 10.49 (8.85–12.14) |
| 2023 | 10.67 (9.06–12.28) |
| **Wisconsin** |  |
| 1999 | 0.87 (0.59–1.23) |
| 2000 | 1.25 (0.91–1.67) |
| 2001 | 1.14 (0.82–1.54) |
| 2002 | 0.98 (0.69–1.36) |
| 2003 | 1.78 (1.38–2.27) |
| 2004 | 1.44 (1.09–1.87) |
| 2005 | 1.42 (1.06–1.85) |
| 2006 | 1.62 (1.25–2.06) |
| 2007 | 1.64 (1.26–2.08) |
| 2008 | 1.55 (1.19–1.98) |
| 2009 | 1.45 (1.1–1.87) |
| 2010 | 1.46 (1.12–1.87) |
| 2011 | 1.8 (1.42–2.26) |
| 2012 | 2.15 (1.72–2.65) |
| 2013 | 2.21 (1.77–2.66) |
| 2014 | 2.33 (1.88–2.78) |
| 2015 | 3.17 (2.64–3.7) |
| 2016 | 3.07 (2.57–3.57) |
| 2017 | 3.08 (2.56–3.59) |
| 2018 | 3.29 (2.76–3.82) |
| 2019 | 4.06 (3.49–4.63) |
| 2020 | 5.17 (4.51–5.82) |
| 2021 | 6.21 (5.48–6.93) |
| 2022 | 6.44 (5.73–7.16) |
| 2023 | 6.85 (6.1–7.59) |
| **Wyoming** |  |
| 2003 | Unreliable data (1.71–6.14) |
| 2005 | Unreliable data (1.29–4.96) |
| 2008 | Unreliable data (2.03–5.97) |
| 2009 | Unreliable data (1.38–4.96) |
| 2011 | Unreliable data (2.42–7.14) |
| 2012 | 5.07 (3.05–7.92) |
| 2013 | Unreliable data (1.13–4.68) |
| 2014 | Unreliable data (2.3–6.54) |
| 2015 | Unreliable data (2.73–7.27) |
| 2016 | 4.32 (2.64–6.68) |
| 2017 | Unreliable data (2.23–6.14) |
| 2018 | 5.43 (3.36–8.31) |
| 2019 | 7.72 (5.24–10.95) |
| 2020 | 9 (6.43–12.26) |
| 2021 | 11.9 (8.8–15.73) |
| 2022 | 10.28 (7.5–13.76) |
| 2023 | 8.25 (5.81–11.37) |

**Footnotes:**

- Age-adjusted mortality rates per 100,000, standardized to the 2000 U.S. population.
- Adults aged ≥25 years.
- State-level rates may be unstable in smaller populations; interpret cautiously.

**Supplemental Table 6: Age-Adjusted Mortality Rates for Liver Disease and Hypertension-Related Deaths per 100,000 Population, by U.S. Census Region, 1999–2023.**

| **Year** | **AAMR - Age-Adjusted Mortality Rates per 100,000** | | | |
| --- | --- | --- | --- | --- |
| **Northeast** | **Midwest** | **South** | **West** |
| **1999** | 2.25 (2.1–2.41) | 3.1 (2.93–3.27) | 2.61 (2.48–2.73) | 3.26 (3.07–3.45) |
| **2000** | 2.79 (2.62–2.96) | 3.72 (3.54–3.91) | 3.1 (2.97–3.24) | 3.73 (3.53–3.93) |
| **2001** | 3.13 (2.95–3.31) | 4.22 (4.02–4.41) | 3.7 (3.55–3.85) | 4.32 (4.11–4.53) |
| **2002** | 3.76 (3.57–3.96) | 5.02 (4.81–5.23) | 4.29 (4.14–4.45) | 5.22 (4.99–5.45) |
| **2003** | 4.28 (4.08–4.49) | 5.65 (5.43–5.87) | 4.98 (4.81–5.15) | 5.97 (5.73–6.22) |
| **2004** | 4.52 (4.31–4.73) | 6.37 (6.14–6.61) | 5.36 (5.19–5.54) | 6.58 (6.32–6.83) |
| **2005** | 5.18 (4.95–5.4) | 7.2 (6.95–7.45) | 6.29 (6.1–5.48) | 7.53 (7.26–7.8) |
| **2006** | 5.5 (5.26–5.73) | 7.76 (7.5–8.02) | 6.59 (6.4–6.77) | 8.29 (8.01–8.57) |
| **2007** | 5.94 (5.7–6.18) | 8.57 (8.3–8.73) | 7.03 (6.83–7.22) | 8.58 (8.3–8.86) |
| **2008** | 6.01 (5.77–6.25) | 9.51 (9.23–9.79) | 7.29 (7.1–7.49) | 8.99 (8.71–9.28) |
| **2009** | 6.31 (6.06–6.55) | 9.21 (8.93–9.48) | 7.88 (7.68–8.08) | 9.09 (8.81–9.37) |
| **2010** | 7.27 (7.02–7.53) | 9.82 (9.54–10.1) | 8.35 (8.15–8.55) | 9.76 (9.47–10.05) |
| **2011** | 7.45 (7.19–7.71) | 10.26 (9.97–10.54) | 8.61 (8.41–8.82) | 10.39 (10.1–10.68) |
| **2012** | 7.75 (7.49–8.02) | 10.03 (9.75–10.31) | 8.75 (8.54–8.95) | 10.48 (10.19–10.78) |
| **2013** | 8.41 (8.14–8.68) | 10.2 (9.92–10.48) | 9.24 (9.04–9.45) | 11.03 (10.74–11.33) |
| **2014** | 8.43 (8.15–8.7) | 10.46 (10.18–10.74) | 9.17 (8.97–9.37) | 10.76 (10.48–11.05) |
| **2015** | 8.47 (8.2–8.74) | 11.21 (10.92–11.5) | 9.55 (9.34–9.75) | 10.85 (10.57–11.13) |
| **2016** | 8.7 (8.43–8.98) | 11.16 (10.88–11.45) | 9.89 (9.68–10.09) | 11.04 (10.76–11.33) |
| **2017** | 8.99 (8.72–9.26) | 11.84 (11.54–12.13) | 10.24 (10.04–10.45) | 11.59 (11.3–11.87) |
| **2018** | 9.54 (9.26–9.82) | 11.99 ( 11.7–12.28) | 11.17 (10.96–11.38) | 11.59 (11.31–11.87) |
| **2019** | 9.92 (9.64–10.2) | 12.42 ( 12.13–12.71) | 12.15 (11.93–12.37) | 12.21 (11.92–12.49) |
| **2020** | 14.51 (14.17–14.85) | 20.05 (19.64–20.45) | 19.24 (18.95–19.53) | 16.07 (15.75–16.39) |
| **2021** | 14.8 (14.46–15.15) | 17.24 (16.89–17.59) | 18.28 (18.01–18.55) | 18.7 (18.35–19.06) |
| **2022** | 14.41 (14.08–14.74) | 16.3 (15.97–16.64) | 17.94 (17.68–18.2) | 17.27 (16.94–17.59) |
| **2023** | 13.78 (13.46–14.11) | 15.21 (14.89–15.53) | 17.75 (17.50–18.01) | 16.65 (16.33–16.97) |

**Footnotes:**

- Age-adjusted mortality rates per 100,000, standardized to the 2000 U.S. population.
- Adults aged ≥25 years.
- Census regions defined as Northeast, Midwest, South, and West according to U.S. Census Bureau definitions.

**Supplemental Table 7: Distribution of Place of Death Among Adults Aged ≥25 Years with Liver Disease and Hypertension-Related Mortality, United States, 1999–2023.**

| **Year** | **AAMR - Age-Adjusted Mortality Rates per 100,000** | | | | | | |
| --- | --- | --- | --- | --- | --- | --- | --- |
| **Medical Facility – Inpatient** | **Medical Facility –**  **Outpatient or ER** | **Medical Facility – Dead on Arrival** | **Decedent's home** | **Hospice Facility** | **Nursing home/Long Term Care** | **Other** |
| **1999** | 1144 | 134 | 24 | 603 | Unreliable data | 292 | 101 |
| **2000** | 1584 | 257 | 41 | 870 | Unreliable data | 411 | 141 |
| **2001** | 1657 | 261 | 33 | 945 | Unreliable data | 466 | 156 |
| **2002** | 1738 | 321 | 38 | 1110 | Unreliable data | 529 | 209 |
| **2003** | 1952 | 323 | 53 | 1253 | Unreliable data | 597 | 242 |
| **2004** | 1899 | 307 | 39 | 1332 | 15 | 608 | 237 |
| **2005** | 1941 | 346 | 30 | 1426 | 60 | 634 | 243 |
| **2006** | 2049 | 368 | 34 | 1522 | 67 | 707 | 261 |
| **2007** | 2225 | 377 | 38 | 1675 | 150 | 688 | 284 |
| **2008** | 2217 | 414 | 31 | 1778 | 178 | 686 | 303 |
| **2009** | 2158 | 436 | 41 | 1952 | 198 | 748 | 283 |
| **2010** | 2297 | 486 | 38 | 2112 | 240 | 771 | 319 |
| **2011** | 2422 | 516 | 38 | 2320 | 309 | 851 | 372 |
| **2012** | 2539 | 552 | 43 | 2530 | 402 | 886 | 429 |
| **2013** | 2654 | 575 | 56 | 2939 | 405 | 990 | 496 |
| **2014** | 2575 | 560 | 40 | 3094 | 470 | 1045 | 468 |
| **2015** | 2730 | 567 | 44 | 3283 | 526 | 1133 | 465 |
| **2016** | 2954 | 661 | 50 | 3650 | 684 | 1139 | 451 |
| **2017** | 3102 | 635 | 38 | 3932 | 781 | 1257 | 525 |
| **2018** | 3412 | 719 | 30 | 4257 | 858 | 1381 | 593 |
| **2019** | 3500 | 782 | 30 | 4755 | 1007 | 1507 | 647 |
| **2020** | 4628 | 971 | 43 | 6585 | 1119 | 1449 | 910 |
| **2021** | 5600 | 1067 | 40 | 7479 | 1234 | 1646 | 952 |
| **2022** | 5517 | 978 | 52 | 7596 | 1441 | 1776 | 1035 |
| **2023** | 5370 | 1042 | 40 | 7636 | 1698 | 1956 | 1023 |

**Footnotes:**

- Adults aged ≥25 years.
- Place of death categories reflect NVSS standards: medical facility (inpatient, outpatient/ER, dead on arrival, unknown), decedent’s home, nursing home/long-term care, and other.
- Counts are unadjusted; percentages may not total 100% due to rounding.

**Supplemental Table 8: Age-Adjusted Mortality Rates for Liver Disease and Hypertension-Related Deaths per 100,000 Population, by 2013 NCHS Urban–Rural Classification, United States, 1999–2023.**

| **Year** | **AAMR - Age-Adjusted Mortality Rates per 100,000** | | | | | |
| --- | --- | --- | --- | --- | --- | --- |
| **Large Central Metro** | **Large Fringe Metro** | **Medium Metro** | **Small Metro** | **Micropolitan (Non–Metro)** | **NonCore (Nonmetro)** |
| **1999** | 1.4 (1.31–1.5) | 0.79 (0.71–0.87) | 1.1 (1.01–1.2) | 1 (0.86–1.13) | 1.06 (0.92–1.2) | 0.68 (0.56–0.8) |
| **2000** | 1.9 (1.79–2.01) | 1.28 (1.18–1.38) | 1.5 (1.39–1.62) | 1.36 (1.2–1.52) | 1.47 (1.3–1.63) | 1.29 (1.12–1.46) |
| **2001** | 2.02(1.91–2.13) | 1.23 (1.14–1.33) | 1.73 (1.61–1.85) | 1.37 (1.21–1.52) | 1.49 (1.33–1.65) | 1.25 (1.08–1.41) |
| **2002** | 2.23(2.12–2.35) | 1.41 (1.21–1.52) | 1.75 (1.63–1.87) | 1.55 (1.39–1.72) | 1.69 (1.52–1.86) | 1.4 (1.23–1.58) |
| **2003** | 2.37(2.25–2.48) | 1.46 (1.36–1.56) | 1.95 (1.83–2.08) | 1.85 (1.67–2.02) | 1.86 (1.68–2.03) | 1.74 (1.55–1.93) |
| **2004** | 2.3 (2.18–2.41) | 1.41 (1.31–1.51) | 2.01 (1.88–2.13) | 1.78 (1.61–1.96) | 1.79 (1.61–1.96) | 1.83 (1.63–2.03) |
| **2005** | 2.37 (2.26–2.49) | 1.47 (1.37–1.57) | 2.09 (1.96–2.22) | 1.73 (1.56–1.9) | 2.02 (1.83–2.2) | 1.71 (1.52–1.9) |
| **2006** | 2.43 (2.31–2.55) | 1.63 (1.53–1.74) | 2.11 (1.98–2.23) | 2.01 (1.83–2.19) | 2.09 (1.91–2.27) | 1.76 (1.57–1.95) |
| **2007** | 2.55 (2.43–2.67) | 1.75 (1.64–1.85) | 2.29 (2.16–2.42) | 2.13 (1.94–2.32) | 2.07 (1.89–2.25) | 1.77 (1.58–1.96) |
| **2008** | 2.73 (2.61–2.86) | 1.63 (1.53–1.74) | 2.33 (2.2–2.46) | 2.11 (1.92–2.29) | 2.13 (1.94–2.31) | 2.13 (1.92–2.34) |
| **2009** | 2.61 (2.49–2.73) | 1.72 (1.62–1.82) | 2.43 (2.3–2.56) | 2.23 (2.04–2.42) | 2.35 (2.16–2.54) | 2.19 (1.98–2.4) |
| **2010** | 2.76 (2.64–2.88) | 1.78 (1.68–1.89) | 2.44 (2.31–2.57) | 2.3 (2.11–2.49) | 2.35 (2.16–2.54) | 2.26 (2.05–2.48) |
| **2011** | 2.85 (2.72–2.97) | 1.96 (1.85–2.07) | 2.62 (2.48–2.75) | 2.46 (2.27–2.66) | 2.55 (2.35–2.75) | 2.54 (2.31–2.77) |
| **2012** | 3 (2.87–3.12) | 2.11 (2–2.22) | 2.83 (2.69–2.97) | 2.62 (2.42–2.81) | 2.74 (2.53–2.95) | 2.43 (2.21–2.65) |
| **2013** | 3.22 (3.1–3.35) | 2.07 (1.96–2.17) | 3.14 (3–3.28) | 2.73 (2.53–2.93) | 3.02 (2.81–3.23) | 2.88 (2.64–3.12) |
| **2014** | 3.31 (3.18–3.44) | 2.1 (1.99–2.21) | 3.06 (2.92–3.2) | 2.8 (2.6–3) | 2.94 (2.73–3.15) | 2.64 (2.41–2.87) |
| **2015** | 3.27 (3.15–3.4) | 2.14 (2.04–2.25) | 3.19 (3.04–3.33) | 2.98 (2.78–3.18) | 3.21 (2.99–3.43) | 3.1 (2.86–3.35) |
| **2016** | 3.36 (3.23–3.48) | 2.35 (2.24–2.46) | 3.6 (3.45–3.75) | 3.2 (2.98–3.41) | 3.46 (3.24–3.69) | 3.41 (3.15–3.67) |
| **2017** | 3.45 (3.33–3.58) | 2.46 (2.35–2.57) | 3.68 (3.53–3.83) | 3.37 (3.16–3.59) | 3.81 (3.57–4.04) | 3.86 (3.59–4.14) |
| **2018** | 3.65 (3.52–3.77) | 2.76 (2.64–2.88) | 3.88 (3.72–4.03) | 3.66 (3.44–3.89) | 4.08 (3.83–4.32) | 4.38 (4.08–4.67) |
| **2019** | 3.71 (3.58–3.83) | 2.88 (2.76–3) | 4.23 (4.07–4.38) | 3.99 (3.75–4.22) | 4.76 (4.49–5.02) | 4.78 (4.47–5.09) |
| **2020** | 4.71 (4.57–4.86) | 3.88 (3.75–4.02) | 5.28 (5.10–5.46) | 4.95 (4.69–5.21) | 6.12 (5.82–6.42) | 5.92 (5.58–6.27) |

**Footnotes:**

- Age-adjusted mortality rates per 100,000, standardized to the 2000 U.S. population.
- Adults aged ≥25 years.
- Urbanization categories follow the 2013 National Center for Health Statistics Urban–Rural Classification Scheme for Counties.

**Supplemental Table 9: Annual Percent Change (APC) in Age-Adjusted Mortality Rates for Liver Disease and Hypertension-Related Deaths per 100,000 Population, by State, United States, 1999–2023**

| **Year Interval** | **APC (95% CI )** | **AAPC (95% CI)** |
| --- | --- | --- |
| **Alabama** | | |
| 1999 – 2018 | 2.42* (1.33 to 3.51) | 4.20* (2.81 to 5.60) |
| 2018 – 2023 | 11.24* (5.28 to 17.54) |
| **Arizona** | | |
| 1999 – 2023 | 8.98* (7.81 to 10.16) | 8.98* (7.81 to 10.16) |
| **California** | | |
| 1999 – 2003 | 13.35* (6.12 to 21.07) | 4.13* (2.03 to 6.27) |
| 2003 – 2018 | 1.41* (0.67 to 2.16) |
| 2018 – 2021 | 11.03 ( -2.47 to 26.40) |
| 2021 – 2023 | –2.69 ( -13.16 to 9.03) |
| **Colorado** | | |
| 1999 – 2007 | 11.95* (7.74 to 16.33) | 9.53* (6.68 to 12.44) |
| 2007 – 2012 | –6.28 ( -13.78 to 1.85) |
| 2012 – 2018 | 24.84* (19.81 to 30.07) |
| 2018 – 2021 | 14.45* (1.62 to 28.91) |
| 2021 – 2023 | –6.31 ( -15.85 to 4.31) |
| **Connecticut** | | |
| 1999 – 2018 | 1.18 ( -0.33 to 2.73) | 3.11* (1.06 to 5.20) |
| 2018 – 2023 | 10.77* (1.74 to 20.61) |
| **Florida** | | |
| 1999 – 2012 | 3.99* (1.52 to 6.53) | 6.88* (5.37 to 8.41) |
| 2012 – 2023 | 10.39* (8.57 to 12.24) |
| **Georgia** | | |
| 1999 – 2014 | 2.28* (0.60 to 3.98) | 6.45* (5.17 to 7.75) |
| 2014 – 2023 | 13.79* (11.48 to 16.15) |
| **Illinois** | | |
| 1999 – 2018 | 2.30* (1.67 to 2.92) | 3.58* (1.41 to 5.80) |
| 2018 – 2021 | 18.63* (1.74 to 38.34) |
| 2021 – 2023 | – 4.87 ( -16.95 to 8.95) |
| **Indiana** | | |
| 1999 – 2023 | 8.02* (6.90 to 9.15) | 8.02* (6.90 to 9.15) |
| **Kentucky** | | |
| 1999 – 2014 | 5.56* (2.92 to 8.26) | 8.24* (6.29 to 10.23) |
| 2014 – 2023 | 12.88* (9.57 to 16.28) |
| **Louisiana** | | |
| 1999 – 2023 | 9.83* (8.98 to 10.69) | 9.83* (8.98 to 10.69) |
| **Maryland** | | |
| 1999 – 2016 | 1.33* (0.36 to 2.30) | 4.22* (2.44 to 6.03) |
| 2016 – 2021 | 23.11* (16.23 to 30.39) |
| 2021 – 2023 | – 12.68 ( -24.71 to 1.27) |
| **Massachusetts** | | |
| 1999 – 2010 | 4.32* (1.82 to 6.89) | 3.70 ( -0.59 to 8.19) |
| 2010 – 2013 | –10.47 ( -36.72 to 26.66) |
| 2013 – 2023 | 7.67* (5.48 to 9.90) |
| **Michigan** | | |
| 1999 – 2018 | 3.08* (2.20 to 3.97) | 3.69* (0.69 to 6.78) |
| 2018 – 2021 | 15.66 ( -6.35 to 42.86) |
| 2021 – 2023 | –6.89 ( -23.21 to 12.89) |
| **Minnesota** | | |
| 1999 – 2002 | 33.63* (12.27 to 59.04) | 11.15* (8.32 to 14.05) |
| 2002 – 2008 | 3.53 ( -1.73 to 9.09) |
| 2008 – 2017 | 9.99* (7.96 to 12.05) |
| 2017 – 2021 | 17.77* (11.50 to 24.39) |
| 2021 – 2023 | –2.52 ( -11.24 to 7.04) |
| **Missouri** | | |
| 1999 – 2014 | 1.59 ( -0.51 to 3.74) | 5.11* (3.43 to 6.82) |
| 2014 – 2023 | 11.26 (8.02 to 14.60) |
| **Nevada** | | |
| 1999 – 2019 | 4.19* (2.31 to 6.10) | 6.92* (4.47 to 9.43) |
| 2019 – 2023 | 21.70* (8.29 to 36.77) |
| **New Jersey** | | |
| 1999 – 2012 | 7.59* (4.86 to 10.40) | 4.64* (2.92 to 6.38) |
| 2012 – 2023 | 1.25 ( -1.08 to 3.65) |
| **New Mexico** | | |
| 2000 – 2018 | 4.86* (2.96 to 6.79) | 7.78* (5.68 to 9.91) |
| 2018 – 2023 | 18.96* (10.85 to 27.66) |
| **New York** | | |
| 1999 – 2012 | 4.29* (2.54 to 6.06) | 4.51* (1.04 to 8.10) |
| 2012 – 2015 | –4.71 ( -27.51 to 25.25) |
| 2015 – 2023 | 8.57* (5.92 to 11.28) |
| **North Carolina** | | |
| 1999 – 2013 | 4.20* (2.85 to 5.57) | 4.91* (2.69 to 7.17) |
| 2013 – 2017 | –8.89 ( -19.31 to 2.87) |
| 2017 – 2023 | 17.10* (13.52 to 20.81) |
| **Ohio** | | |
| 1999 – 2007 | 9.63* (7.15 to 12.16) | 4.60* (3.49 to 5.73) |
| 2007 – 2016 | –1.40 ( -3.12 to 0.34) |
| 2016 – 2023 | 6.99* (4.95 to 9.06) |
| **Oregon** | | |
| 1999 – 2017 | 6.53* (4.57 to 8.53) | 9.65* (7.81 to 11.52) |
| 2017 – 2023 | 19.57* (14.23 to 25.15) |
| **Pennsylvania** | | |
| 1999 – 2017 | 2.89* (1.83 to 3.96) | 5.13* (3.95 to 6.32) |
| 2017 – 2023 | 12.13* (8.10 to 16.30) |
| **South Carolina** | | |
| 1999 – 2018 | 4.39* (2.86 to 5.94) | 9.12* (7.47 to 10.79) |
| 2018 – 2023 | 29.11* (22.37 to 36.22) |
| **Tennessee** | | |
| 1999 – 2018 | 5.82* (4.96 to 6.68) | 6.98* (4.68 to 9.32) |
| 2018 – 2021 | 20.82* (3.52 to 41.02) |
| 2021 – 2023 | –1.13 ( -13.77 to 13.34) |
| **Texas** | | |
| 1999 – 2023 | 6.87* (6.38 to 7.37) | 6.87* (6.38 to 7.37) |
| **Virginia** | | |
| 1999 – 2018 | 3.19* (2.06 to 4.33) | 6.29* (2.99 to 9.69) |
| 2018 – 2021 | 27.01* (0.48 to 60.53) |
| 2021 – 2023 | 7.85 ( -9.57 to 28.64) |
| **Washington** | | |
| 1999 – 2002 | 29.97 ( -5.86 to 79.46) | 8.39* (3.18 to 13.86) |
| 2002 – 2018 | 4.26* (2.67 to 5.86) |
| 2018 – 2021 | 18.53 ( -6.54 to 50.32) |
| 2021 – 2023 | 7.85 ( -9.57 to 28.64) |
| **West Virginia** | | |
| 1999 – 2018 | 3.61* (2.15 to 5.09) | 6.08* (4.27 to 7.93) |
| 2018 – 2023 | 16.03* (8.19 to 24.43) |
| **Wisconsin** | | |
| 1999 – 2011 | 3.41* (0.22 to 6.70) | 7.81* (6.03 to 9.62) |
| 2011 – 2023 | 12.40* (10.54 to 14.28) |

**Footnotes:**

- Age-adjusted mortality rates per 100,000, standardized to the 2000 U.S. population.
- Adults aged ≥25 years.
- APC calculated using Joinpoint Regression Program (NCI, version X.X).
- APCs reported with 95% CI. * indicates statistical significance (p < 0.05).
- State-level APCs may be unstable in smaller populations; interpret cautiously.

**Supplementary Fig 1.1 Joinpoint Regression Analysis of Age-Adjusted Mortality Rates for Liver Disease and Hypertension-Related Deaths by Race/Ethnicity, United States, 1999–2023**


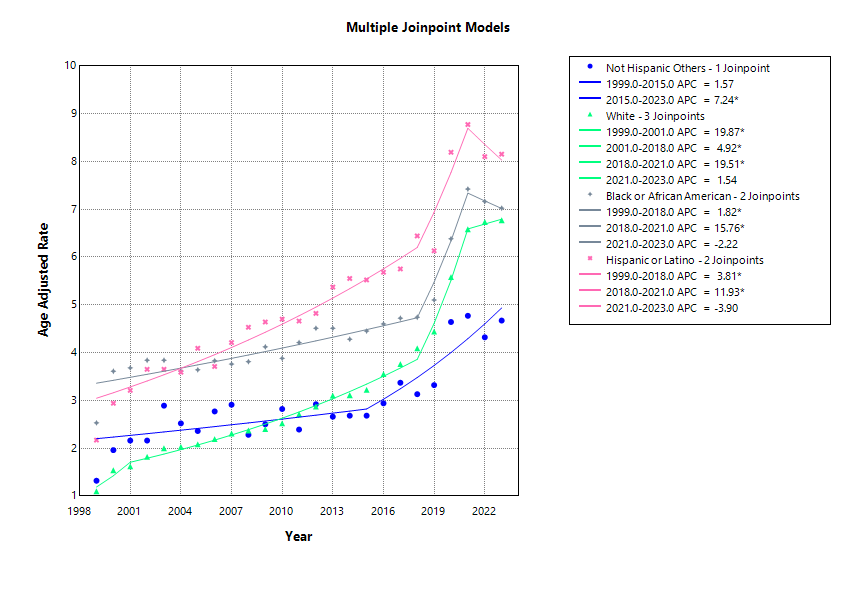


**Legend.** Age-adjusted mortality rates (AAMRs) per 100,000 population are standardized to the 2000 U.S. standard population. Solid lines represent observed rates, and segmented lines show Joinpoint regression fits. Circles (●) denote statistically significant joinpoints, where the slope of the trend changes. Annual percent change (APC) values appear for each segment, with an asterisk (*) that indicates significance at p < 0.05.

**Supplementary Fig 2: Joinpoint Regression Analysis of Age-Adjusted Mortality Rates for Liver Disease and Hypertension-Related Deaths by Gender, United States, 1999–2023**


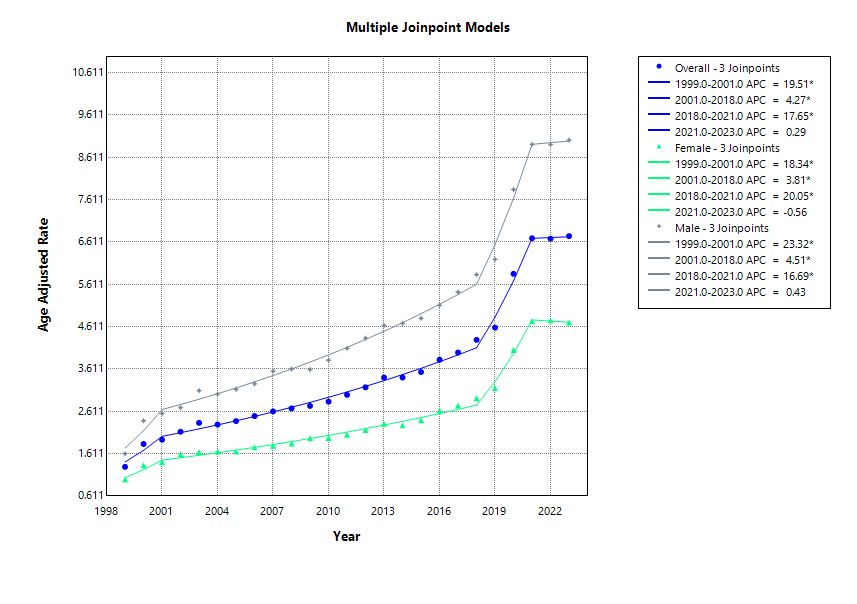


**Legend.** Age-adjusted mortality rates (AAMRs) per 100,000 population are standardized to the 2000 U.S. standard population. Solid lines represent observed rates, and segmented lines indicate Joinpoint regression fits. Circles (●, ▲) mark observed values for overall, female, and male subgroups. Annual percent change (APC) values are shown for each segment; an asterisk (*) indicates statistical significance at p < 0.05. Joinpoints denote statistically significant inflection years where trends shifted. Estimates were generated using the National Cancer Institute’s Joinpoint Regression Program (version 5.0.2) with mortality data derived from CDC WONDER Multiple Cause-of-Death files, 1999–2023.

**Supplementary Fig 3: Joinpoint Regression Analysis of Age-Adjusted Mortality Rates for Liver Disease and Hypertension-Related Deaths by Census region, United States, 1999–2023**


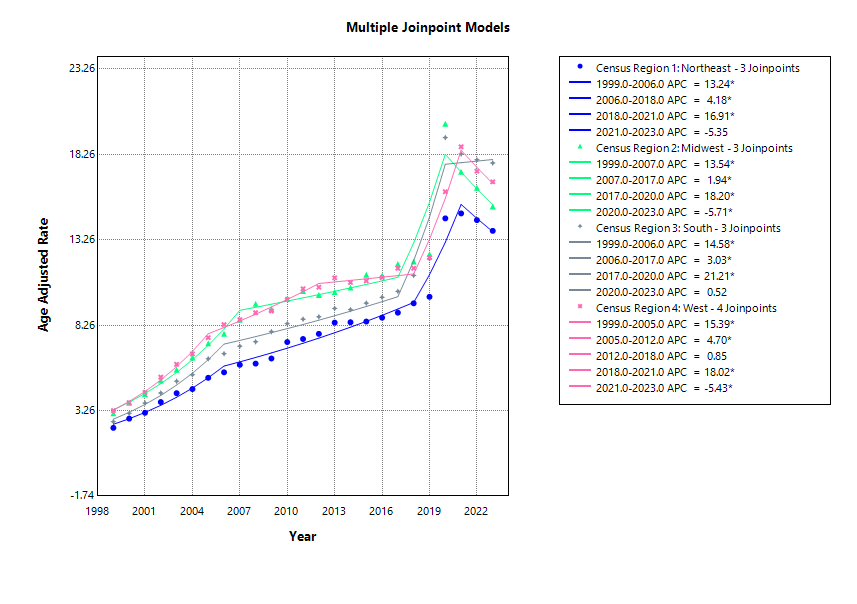


**Legend.** Age-adjusted mortality rates (AAMRs) per 100,000 population are standardized to the 2000 U.S. standard population. Solid lines indicate Joinpoint regression fits, and markers (●, ▲, +, ■) denote observed values for each census region. Annual percent change (APC) values are shown for each trend segment; an asterisk (*) indicates statistical significance at p < 0.05. Joinpoints mark statistically significant inflection years where the slope of mortality trends changed. Estimates were generated using the National Cancer Institute’s Joinpoint Regression Program (version 5.0.2) with CDC WONDER Multiple Cause-of-Death data for liver disease and hypertension-related deaths, 1999–2023.

**Supplementary Fig 4 : Joinpoint Regression Analysis of Age-Adjusted Mortality Rates for Liver Disease and Hypertension-Related Deaths by 2013 Urbanisation, United States, 1999–2020**


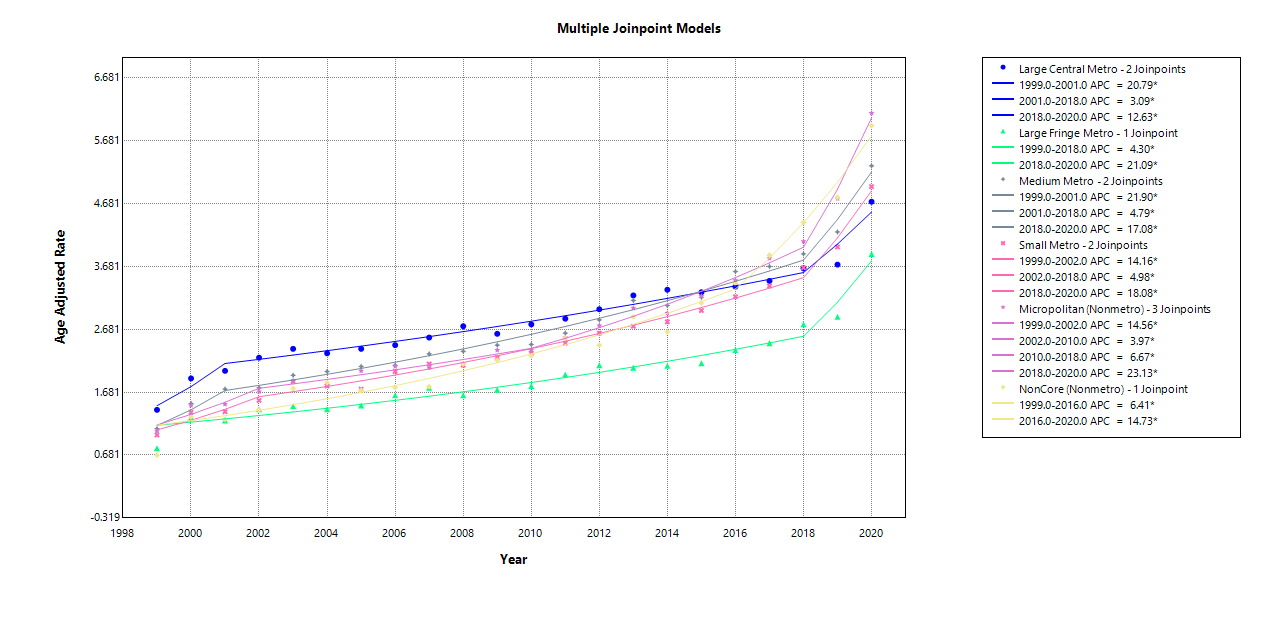


Legend: Age-adjusted mortality rates (AAMRs) per 100,000 population are standardized to the 2000 U.S. standard population. Solid lines represent Joinpoint regression fits, with markers (●, ▲, ■, etc.) denoting observed values for each urbanization category. Annual percent change (APC) values are listed for each segment; an asterisk (*) indicates statistical significance at p < 0.05. Joinpoint represent statistically significant inflection years where the slope of mortality trends changed. Analyses were conducted using the National Cancer Institute’s Joinpoint Regression Program (version 5.0.2) with CDC WONDER Multiple Cause-of-Death data for liver disease and hypertension-related deaths, 1999–2020.

**Supplementary Fig 5: Joinpoint Regression Analysis of Age-Adjusted Mortality Rates for Liver Disease and Hypertension-Related Deaths by States, United States, 1999–2023**
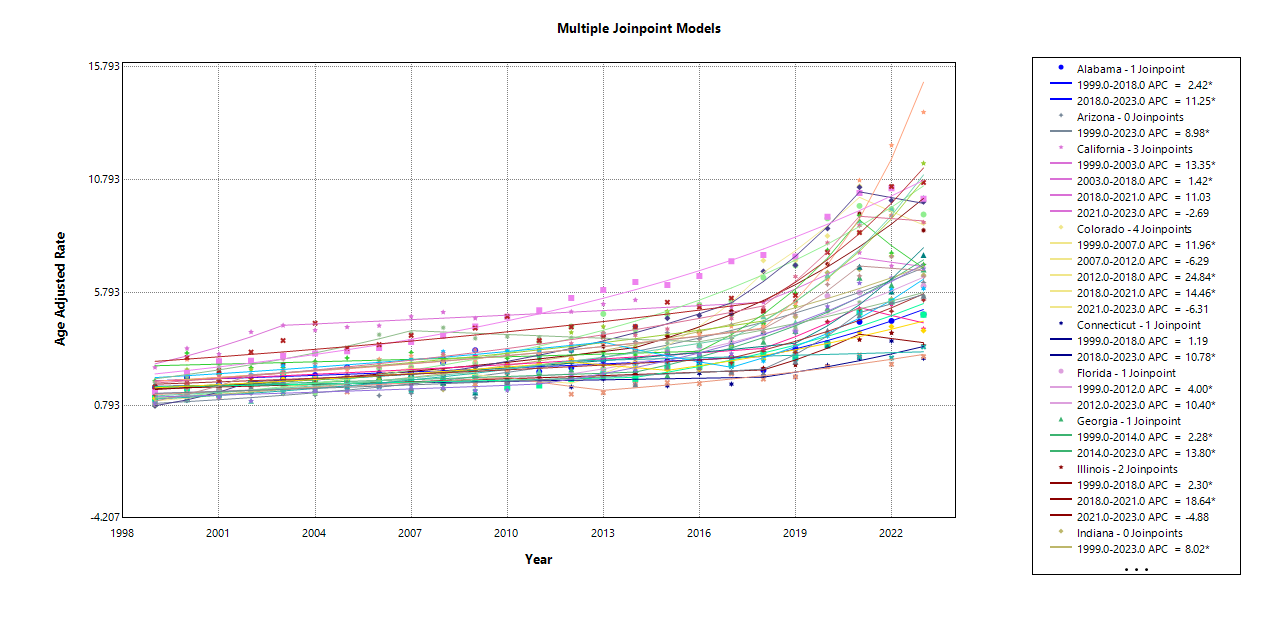


Legend: Age-adjusted mortality rates (AAMRs) per 100,000 population are standardized to the 2000 U.S. standard population. Solid lines represent Joinpoint regression fits, and markers (●, ▲, ■, etc.) indicate observed values for each state. Annual percent change (APC) values are shown for each trend segment, with an asterisk (*) indicating significance at p < 0.05. Joinpoint mark statistically significant inflection years where mortality trends changed slope. Analyses were performed using the National Cancer Institute’s Joinpoint Regression Program (version 5.0.2) with CDC WONDER Multiple Cause-of-Death data for liver disease and hypertension-related deaths, 1999–2023.
